# Supplementary material for: Colonic Transit Time Is a Driven Force of the Gut Microbiota Composition and Metabolism: In Vitro Evidence
Source: PubMed Central journal article supplement — J Neurogastroenterol Motil. 2017 Jan 1;23(1):124–34. doi: 10.5056/jnm16042 (PMC5216643; doi:10.5056/jnm16042), 2017-01-01
Supplement: JNM-23-124_suppl.1.pdf [file JNM-23-124_suppl.1.pdf]

| mass @<br>retention time | Simulated region<br>Sample | Simulated transit time  |      | 48 hr |      |      |      | 96 hr |      |       |      |      |      |
|--------------------------|----------------------------|-------------------------|------|-------|------|------|------|-------|------|-------|------|------|------|
|                          |                            | Prox                    |      | Trans |      | Dist |      | Prox  |      | Trans |      | Dist |      |
|                          |                            | 1                       | 3    | 1     | 3    | 1    | 3    | 1     | 3    | 1     | 3    | 1    | 3    |
|                          | Formula                    | Log of normalized value |      |       |      |      |      |       |      |       |      |      |      |
| p100.076@4.8             | C43H83O13P                 | 2,18                    | 2,23 | 2,70  | 2,39 | 2,41 | 2,78 | 2,64  | 2,66 | 2,50  | 2,53 | 2,52 | 2,53 |
| p120.08@4.7              |                            | 2,63                    | 2,62 | 3,06  | 2,66 | 2,54 | 2,89 | 3,10  | 3,00 | 2,61  | 2,52 | 1,33 | 1,03 |
| p132.101@7.8             | C5H8O3S                    | 0,93                    | 1,05 | 1,51  | 1,49 | 2,36 | 2,70 | 1,68  | 1,61 | 1,99  | 2,02 | 2,13 | 2,10 |
| p144.08@5.7              |                            | 1,96                    | 1,93 | 2,17  | 2,02 | 1,75 | 2,18 | 2,27  | 2,19 | 1,72  | 1,78 | 1,65 | 1,60 |
| p149.023@13.6            |                            | 2,00                    | 1,93 | 2,02  | 2,01 | 1,87 | 1,99 | 2,04  | 2,06 | 1,90  | 1,93 | 1,86 | 1,95 |
| p166.087@4.7             | C13H18O2                   | 1,27                    | 0,91 | 1,91  | 1,95 | 2,29 | 2,72 | 2,54  | 2,35 | 2,68  | 2,85 | 1,88 | 1,60 |
| p166.087@8.2             | C24H33FO6                  | 2,47                    | 2,46 | 2,71  | 2,51 | 2,42 | 2,60 | 2,78  | 2,69 | 2,45  | 2,39 | 1,35 | 1,17 |
| p170.118@6.3             |                            | 2,09                    | 2,13 | 2,39  | 2,24 | 2,20 | 2,40 | 2,44  | 2,32 | 2,22  | 2,23 | 2,18 | 2,21 |
| p181.123@12.1            |                            | 1,40                    | 1,43 | 1,71  | 1,60 | 1,68 | 1,69 | 1,53  | 1,73 | 1,66  | 1,70 | 1,48 | 1,40 |
| p188.072@5.3             | C18H39NO2                  | 3,03                    | 3,10 | 3,03  | 2,21 | 1,17 | 1,37 | 2,74  | 2,98 | 1,24  | 1,15 | 1,01 | 0,70 |
| p197.13@5.7              |                            | 1,80                    | 1,73 | 2,11  | 1,91 | 1,91 | 2,23 | 2,03  | 2,01 | 1,98  | 1,91 | 2,07 | 2,04 |
| p198.15@7.7              |                            | 2,05                    | 1,96 | 2,27  | 2,21 | 2,20 | 2,48 | 2,17  | 2,03 | 2,18  | 2,39 | 2,23 | 2,23 |
| p203.178@12.1            |                            | 1,75                    | 1,71 | 1,93  | 1,79 | 1,91 | 1,98 | 1,88  | 1,93 | 1,88  | 1,91 | 1,75 | 1,74 |
| p205.099@5.3             |                            | 2,36                    | 2,44 | 2,31  | 1,56 | 0,00 | 0,01 | 1,98  | 2,28 | 0,48  | 0,85 | 0,00 | 0,00 |
| p207.14@12.1             |                            | 1,74                    | 1,75 | 1,96  | 1,83 | 1,92 | 2,01 | 1,87  | 1,92 | 1,88  | 2,00 | 1,72 | 1,68 |
| p208.171@9.6             |                            | 2,12                    | 2,24 | 2,11  | 1,95 | 1,80 | 1,97 | 1,90  | 1,53 | 1,49  | 1,52 | 0,96 | 0,31 |
| p209.138@10.3            | C24H34O4                   | 1,71                    | 1,77 | 1,63  | 1,40 | 1,42 | 1,64 | 2,07  | 2,00 | 1,81  | 1,78 | 1,63 | 1,65 |
| p211.145@6.6             |                            | 2,14                    | 2,12 | 2,38  | 2,15 | 2,22 | 2,35 | 2,39  | 2,20 | 2,29  | 2,40 | 2,35 | 2,31 |
| p213.166@10.3            |                            | 2,05                    | 2,03 | 1,97  | 1,80 | 1,84 | 1,94 | 2,38  | 2,31 | 2,11  | 2,10 | 1,93 | 1,91 |
| p215.181@12.1            |                            | 2,20                    | 2,19 | 2,40  | 2,31 | 2,33 | 2,47 | 2,31  | 2,39 | 2,36  | 2,42 | 2,21 | 2,19 |
| p221.155@12.1            |                            | 2,21                    | 2,25 | 2,45  | 2,34 | 2,40 | 2,51 | 2,36  | 2,39 | 2,37  | 2,44 | 2,27 | 2,25 |
| p226.181@9               |                            | 1,86                    | 1,77 | 1,92  | 1,85 | 1,80 | 2,07 | 1,95  | 2,00 | 1,87  | 1,89 | 1,83 | 1,89 |
| p227.14@5.8              | C21H26O2                   | 2,11                    | 2,04 | 1,97  | 1,83 | 1,85 | 2,01 | 2,37  | 2,30 | 2,13  | 2,16 | 1,89 | 1,93 |
| p227.162@10.3            |                            | 2,12                    | 2,16 | 2,64  | 2,45 | 2,53 | 2,65 | 2,56  | 2,49 | 2,63  | 2,65 | 2,64 | 2,68 |
| p228.233@13.8            |                            | 2,05                    | 2,30 | 2,42  | 2,39 | 2,24 | 2,63 | 2,32  | 2,38 | 2,45  | 2,57 | 2,22 | 2,45 |
| p229.192@12.1            |                            | 1,95                    | 1,97 | 2,19  | 2,07 | 2,19 | 2,20 | 2,05  | 2,18 | 2,09  | 2,18 | 2,01 | 2,00 |
| p232.228@8.8             |                            | 1,99                    | 2,08 | 1,95  | 1,85 | 1,83 | 1,85 | 1,86  | 1,54 | 1,39  | 1,56 | 1,43 | 1,42 |
| p235.17@12.1             |                            | 1,83                    | 1,83 | 2,08  | 1,98 | 2,02 | 2,13 | 1,95  | 2,04 | 1,99  | 2,09 | 1,89 | 1,79 |
| p236.128@8.2             |                            | 0,70                    | 0,85 | 1,40  | 1,48 | 1,82 | 2,20 | 2,00  | 1,77 | 2,18  | 2,38 | 1,51 | 1,14 |
| p239.149@7.2             | C27H44NO7P                 | 2,53                    | 2,57 | 2,77  | 2,66 | 2,69 | 2,94 | 2,74  | 2,69 | 2,79  | 2,77 | 2,73 | 2,76 |
| p241.195@10.3            |                            | 1,99                    | 1,96 | 1,97  | 1,69 | 1,75 | 1,87 | 2,27  | 2,25 | 2,03  | 2,07 | 1,87 | 1,85 |
| p243.209@12.1            |                            | 2,11                    | 2,13 | 2,36  | 2,22 | 2,33 | 2,42 | 2,25  | 2,34 | 2,29  | 2,37 | 2,21 | 2,13 |
| p245.131@6.9             |                            | 2,39                    | 2,34 | 2,30  | 2,13 | 2,20 | 2,29 | 2,67  | 2,63 | 2,45  | 2,47 | 2,21 | 2,27 |
| p245.154@9.6             |                            | 1,96                    | 2,27 | 2,22  | 2,00 | 1,93 | 2,25 | 2,28  | 2,28 | 1,97  | 2,04 | 1,98 | 1,93 |
| p245.155@10.3            |                            | 2,47                    | 2,45 | 2,60  | 2,32 | 2,14 | 2,27 | 2,21  | 2,13 | 2,35  | 2,54 | 2,57 | 2,49 |
| p247.171@12.1            |                            | 2,08                    | 2,20 | 2,37  | 2,26 | 2,32 | 2,40 | 2,30  | 2,34 | 2,29  | 2,36 | 2,17 | 2,14 |
| p249.185@12.1            |                            | 1,53                    | 1,60 | 1,74  | 1,65 | 1,77 | 1,82 | 1,69  | 1,69 | 1,78  | 1,73 | 1,57 | 1,47 |

|               |            |      |      |      |      |      |      |      |      |      |      |      |      |
|---------------|------------|------|------|------|------|------|------|------|------|------|------|------|------|
| p251.048@14.8 |            | 1,93 | 1,86 | 1,96 | 1,91 | 1,92 | 2,00 | 2,02 | 1,90 | 1,95 | 2,04 | 2,04 | 1,91 |
| p251.15@4.5   |            | 1,69 | 1,67 | 2,01 | 1,78 | 0,55 | 1,45 | 2,19 | 2,14 | 1,79 | 1,68 | 0,93 | 0,96 |
| p253.161@9.6  |            | 2,23 | 2,16 | 2,36 | 2,16 | 1,85 | 1,99 | 1,93 | 1,90 | 2,13 | 2,34 | 2,34 | 2,29 |
| p255.205@10.3 |            | 1,73 | 1,71 | 1,71 | 1,33 | 1,54 | 1,58 | 2,04 | 2,02 | 1,78 | 1,81 | 1,50 | 1,61 |
| p256.264@15.2 | C18H37NO2  | 3,06 | 3,23 | 3,44 | 3,45 | 3,93 | 3,43 | 3,33 | 3,26 | 3,58 | 3,52 | 3,30 | 3,45 |
| p257.267@15.2 |            | 2,34 | 2,53 | 2,72 | 2,71 | 3,22 | 2,74 | 2,61 | 2,53 | 2,82 | 2,79 | 2,58 | 2,74 |
| p258.271@15.2 | C24H38O3   | 1,39 | 1,59 | 1,68 | 1,77 | 2,23 | 1,75 | 1,59 | 1,60 | 1,84 | 1,84 | 1,62 | 1,73 |
| p259.171@10.3 | C13H14N2O8 | 1,93 | 1,94 | 1,87 | 1,70 | 1,79 | 1,92 | 2,26 | 2,22 | 2,05 | 2,06 | 1,77 | 1,87 |
| p260.259@9.9  | C10H16N2O2 | 1,65 | 1,75 | 2,05 | 2,03 | 2,15 | 2,22 | 2,28 | 2,22 | 2,23 | 2,26 | 2,06 | 2,04 |
| p261.126@6.2  |            | 1,94 | 1,99 | 2,31 | 2,13 | 2,12 | 2,26 | 2,21 | 2,01 | 2,18 | 2,21 | 2,18 | 2,19 |
| p261.185@12.1 |            | 1,90 | 1,99 | 2,19 | 2,11 | 2,14 | 2,28 | 2,10 | 2,18 | 2,10 | 2,18 | 1,97 | 1,90 |
| p265.253@14   | C18H20O4   | 1,62 | 1,97 | 2,47 | 2,38 | 2,06 | 2,56 | 2,04 | 2,26 | 2,58 | 2,64 | 2,41 | 2,55 |
| p270.279@14.3 |            | 2,58 | 2,55 | 2,54 | 2,55 | 2,52 | 2,60 | 2,49 | 2,55 | 2,55 | 2,49 | 2,53 | 2,54 |
| p271.17@9.6   |            | 3,01 | 3,00 | 3,16 | 2,93 | 2,69 | 2,79 | 2,75 | 2,72 | 2,93 | 3,11 | 3,16 | 3,09 |
| p272.174@9.6  |            | 2,35 | 2,32 | 2,51 | 2,21 | 1,98 | 2,13 | 2,05 | 1,99 | 2,26 | 2,40 | 2,45 | 2,42 |
| p274.274@10.5 |            | 1,15 | 1,17 | 1,85 | 1,91 | 2,38 | 2,10 | 2,11 | 1,99 | 1,98 | 2,14 | 1,88 | 2,07 |
| p275.201@12.1 |            | 2,14 | 2,18 | 2,42 | 2,25 | 2,36 | 2,46 | 2,29 | 2,35 | 2,33 | 2,39 | 2,20 | 2,17 |
| p282.278@15.4 |            | 1,71 | 1,77 | 1,76 | 1,77 | 1,75 | 1,99 | 1,81 | 1,86 | 1,82 | 1,98 | 1,92 | 2,10 |
| p283.264@14   |            | 1,44 | 1,64 | 2,08 | 1,94 | 1,65 | 2,15 | 1,70 | 1,81 | 2,21 | 2,26 | 1,96 | 2,17 |
| p284.295@11.6 | C16H20O2   | 1,75 | 1,82 | 2,39 | 2,38 | 2,94 | 2,39 | 2,30 | 2,13 | 2,46 | 2,50 | 2,29 | 2,59 |
| p286.221@15.2 |            | 1,82 | 1,77 | 1,77 | 1,68 | 1,92 | 1,77 | 1,71 | 1,71 | 1,87 | 1,82 | 1,81 | 1,63 |
| p288.289@11   | C25H32O10  | 2,35 | 2,48 | 3,19 | 3,24 | 3,74 | 3,14 | 2,94 | 2,91 | 3,13 | 3,19 | 2,88 | 3,05 |
| p289.293@11   |            | 1,67 | 1,78 | 2,52 | 2,56 | 3,05 | 2,41 | 2,23 | 2,19 | 2,44 | 2,49 | 2,18 | 2,35 |
| p297.187@9.6  |            | 1,96 | 1,90 | 2,07 | 1,83 | 1,56 | 1,81 | 1,73 | 1,57 | 1,89 | 2,09 | 2,06 | 2,02 |
| p300.29@9.9   | C5H9NO     | 0,00 | 0,00 | 0,00 | 0,00 | 2,92 | 2,90 | 0,00 | 0,00 | 2,88 | 2,93 | 3,20 | 3,03 |
| p301.141@13.6 | C24H38O4   | 1,99 | 2,01 | 1,99 | 2,01 | 2,03 | 2,04 | 2,01 | 2,05 | 2,02 | 2,03 | 2,05 | 2,06 |
| p302.305@11.6 | C16H22O2   | 2,30 | 2,45 | 2,97 | 2,97 | 3,50 | 2,96 | 2,85 | 2,71 | 3,04 | 3,07 | 2,87 | 3,13 |
| p303.309@11.6 | C18H34O2   | 1,65 | 1,76 | 2,28 | 2,31 | 2,83 | 2,30 | 2,19 | 2,00 | 2,36 | 2,39 | 2,18 | 2,43 |
| p305.154@6.8  |            | 1,89 | 2,06 | 2,06 | 1,83 | 1,88 | 1,95 | 2,04 | 2,12 | 1,90 | 1,92 | 2,02 | 1,99 |
| p311.201@9.6  |            | 2,36 | 2,50 | 2,27 | 2,32 | 2,43 | 2,38 | 2,33 | 2,35 | 2,37 | 2,54 | 2,51 | 2,45 |
| p311.255@15.3 |            | 2,02 | 1,97 | 2,11 | 1,80 | 1,56 | 1,79 | 1,73 | 1,60 | 1,85 | 2,02 | 2,07 | 2,04 |
| p312.261@15.3 |            | 1,61 | 1,68 | 1,64 | 1,63 | 1,68 | 1,59 | 1,61 | 1,73 | 1,66 | 1,79 | 1,76 | 1,75 |
| p314.305@12.3 |            | 0,93 | 1,43 | 1,98 | 1,75 | 2,12 | 1,56 | 2,32 | 2,12 | 2,05 | 2,02 | 1,25 | 1,70 |
| p316.32@12    |            | 1,96 | 2,19 | 2,67 | 2,52 | 3,01 | 2,40 | 2,51 | 2,42 | 2,59 | 2,69 | 2,38 | 2,79 |
| p317.227@9.6  |            | 2,55 | 2,60 | 2,72 | 2,43 | 2,26 | 2,37 | 2,29 | 2,27 | 2,45 | 2,67 | 2,69 | 2,65 |
| p318.23@9.6   |            | 2,04 | 1,99 | 2,19 | 1,92 | 1,61 | 1,79 | 1,72 | 1,50 | 1,86 | 2,11 | 2,16 | 2,05 |
| p319.242@10.3 |            | 2,48 | 2,42 | 2,40 | 2,24 | 2,32 | 2,41 | 2,79 | 2,74 | 2,55 | 2,56 | 2,33 | 2,35 |
| p320.247@10.3 |            | 1,96 | 1,90 | 1,88 | 1,64 | 1,70 | 1,85 | 2,27 | 2,13 | 1,94 | 2,01 | 1,79 | 1,83 |
| p321.257@12.1 |            | 1,95 | 1,97 | 2,01 | 1,95 | 2,00 | 2,00 | 1,99 | 2,00 | 1,99 | 1,94 | 1,98 | 2,02 |
| p321.315@18.1 |            | 2,33 | 2,39 | 2,59 | 2,52 | 2,56 | 2,64 | 2,49 | 2,56 | 2,55 | 2,59 | 2,41 | 2,35 |
| p322.262@12.1 | C43H79O13P | 1,79 | 1,80 | 2,02 | 1,94 | 1,98 | 2,05 | 1,99 | 1,90 | 1,96 | 2,02 | 1,78 | 1,84 |
| p323.233@8.2  |            | 1,81 | 1,72 | 1,95 | 1,82 | 1,87 | 2,07 | 1,97 | 1,88 | 1,79 | 2,06 | 1,92 | 1,82 |

|               |             |      |      |      |      |      |      |      |      |      |      |      |      |
|---------------|-------------|------|------|------|------|------|------|------|------|------|------|------|------|
| p326.377@13   |             | 2,05 | 2,05 | 2,17 | 2,18 | 2,03 | 2,12 | 2,13 | 2,15 | 1,99 | 2,04 | 2,03 | 2,07 |
| p327.078@12.7 |             | 1,91 | 1,98 | 2,09 | 1,96 | 1,91 | 2,17 | 2,11 | 2,13 | 1,86 | 1,99 | 1,91 | 2,01 |
| p328.266@15.2 |             | 1,73 | 1,77 | 1,73 | 1,56 | 1,85 | 1,69 | 1,70 | 1,48 | 1,78 | 1,60 | 1,85 | 1,75 |
| p332.331@12.7 |             | 1,69 | 1,71 | 1,90 | 1,80 | 1,78 | 1,93 | 1,91 | 1,94 | 1,72 | 1,82 | 1,77 | 1,77 |
| p333.3@15.3   |             | 1,87 | 1,93 | 1,86 | 1,89 | 1,84 | 1,85 | 1,85 | 1,88 | 1,82 | 1,89 | 1,98 | 1,91 |
| p335.236@9.6  |             | 3,25 | 3,23 | 3,37 | 3,13 | 2,88 | 3,03 | 2,99 | 2,94 | 3,12 | 3,33 | 3,38 | 3,30 |
| p336.241@9.6  |             | 2,68 | 2,66 | 2,78 | 2,56 | 2,35 | 2,44 | 2,38 | 2,35 | 2,57 | 2,71 | 2,80 | 2,71 |
| p337.252@10.3 |             | 2,82 | 2,80 | 2,77 | 2,55 | 2,60 | 2,75 | 3,12 | 3,09 | 2,90 | 2,92 | 2,67 | 2,70 |
| p337.252@8.9  |             | 2,17 | 2,02 | 2,74 | 2,96 | 3,02 | 3,19 | 2,12 | 2,05 | 2,53 | 2,53 | 2,21 | 2,23 |
| p338.341@18.1 |             | 2,81 | 2,82 | 2,86 | 2,84 | 2,89 | 2,86 | 2,86 | 2,87 | 2,83 | 2,79 | 2,82 | 2,85 |
| p339.268@12.1 | C44H69N5O10 | 2,94 | 2,96 | 3,20 | 3,10 | 3,17 | 3,23 | 3,10 | 3,16 | 3,14 | 3,18 | 2,99 | 2,97 |
| p340.272@12.1 |             | 2,35 | 2,41 | 2,64 | 2,57 | 2,59 | 2,67 | 2,51 | 2,60 | 2,54 | 2,64 | 2,40 | 2,37 |
| p341.242@8.2  |             | 1,78 | 1,76 | 1,83 | 1,88 | 1,93 | 1,96 | 1,89 | 1,90 | 1,89 | 1,82 | 1,90 | 1,79 |
| p341.265@14.6 |             | 2,73 | 2,75 | 2,89 | 2,76 | 2,79 | 3,06 | 2,79 | 2,80 | 2,78 | 2,95 | 2,86 | 2,78 |
| p342.245@8.2  |             | 2,13 | 2,04 | 2,21 | 2,11 | 2,14 | 2,41 | 2,17 | 2,15 | 2,08 | 2,30 | 2,20 | 2,07 |
| p353.246@9.6  | C43H82O16P2 | 3,82 | 3,80 | 3,93 | 3,71 | 3,49 | 3,62 | 3,59 | 3,55 | 3,72 | 3,91 | 3,95 | 3,89 |
| p354.251@9.6  |             | 3,27 | 3,23 | 3,37 | 3,14 | 2,94 | 3,04 | 3,02 | 2,99 | 3,16 | 3,36 | 3,41 | 3,34 |
| p355.261@10.3 |             | 4,04 | 4,01 | 3,98 | 3,78 | 3,84 | 3,95 | 4,29 | 4,26 | 4,11 | 4,12 | 3,89 | 3,92 |
| p355.262@8.9  |             | 3,45 | 3,17 | 3,91 | 4,08 | 4,16 | 4,27 | 3,27 | 3,24 | 3,70 | 3,69 | 3,44 | 3,45 |
| p356.266@10.3 | C24H38O4    | 3,48 | 3,47 | 3,44 | 3,23 | 3,29 | 3,40 | 3,77 | 3,75 | 3,57 | 3,58 | 3,35 | 3,36 |
| p356.266@8.9  |             | 2,91 | 2,62 | 3,35 | 3,54 | 3,64 | 3,76 | 2,70 | 2,66 | 3,14 | 3,14 | 2,87 | 2,89 |
| p356.389@12.8 |             | 1,86 | 1,74 | 1,95 | 1,82 | 1,74 | 1,94 | 1,96 | 2,00 | 1,73 | 1,83 | 1,76 | 1,86 |
| p357.277@12.1 |             | 3,88 | 3,91 | 4,12 | 4,02 | 4,08 | 4,13 | 4,02 | 4,08 | 4,06 | 4,11 | 3,93 | 3,90 |
| p358.282@12.1 |             | 3,32 | 3,36 | 3,59 | 3,48 | 3,55 | 3,60 | 3,47 | 3,54 | 3,51 | 3,57 | 3,38 | 3,36 |
| p359.286@12.1 |             | 2,51 | 2,55 | 2,74 | 2,65 | 2,72 | 2,76 | 2,64 | 2,74 | 2,72 | 2,78 | 2,57 | 2,57 |
| p360.291@12.1 |             | 1,57 | 1,77 | 1,89 | 1,79 | 1,90 | 1,91 | 1,84 | 1,87 | 1,83 | 1,93 | 1,66 | 1,62 |
| p362.219@6.8  |             | 1,73 | 1,57 | 2,04 | 1,83 | 1,61 | 1,77 | 1,87 | 1,88 | 1,56 | 1,44 | 1,59 | 1,25 |
| p363.306@14.6 |             | 1,73 | 1,52 | 1,66 | 1,62 | 1,69 | 1,76 | 1,70 | 1,75 | 1,68 | 1,75 | 1,69 | 1,64 |
| p369.264@8.9  |             | 2,11 | 2,01 | 2,18 | 2,09 | 2,20 | 2,28 | 2,21 | 2,11 | 2,14 | 2,21 | 2,25 | 2,18 |
| p371.227@7.3  |             | 2,73 | 2,76 | 2,96 | 2,89 | 2,90 | 3,13 | 2,91 | 2,84 | 2,95 | 2,95 | 2,98 | 2,95 |
| p371.257@9.6  | C43H84O16P2 | 3,51 | 3,48 | 3,63 | 3,39 | 3,18 | 3,30 | 3,29 | 3,23 | 3,41 | 3,60 | 3,65 | 3,57 |
| p372.262@9.6  |             | 2,94 | 2,92 | 3,08 | 2,84 | 2,55 | 2,73 | 2,69 | 2,66 | 2,86 | 3,04 | 3,08 | 3,00 |
| p373.272@10.3 |             | 3,76 | 3,73 | 3,68 | 3,47 | 3,55 | 3,65 | 4,04 | 3,99 | 3,84 | 3,86 | 3,60 | 3,64 |
| p373.272@8.9  |             | 3,02 | 2,67 | 3,48 | 3,68 | 3,78 | 3,92 | 2,81 | 2,78 | 3,26 | 3,27 | 2,99 | 3,01 |
| p374.277@10.3 |             | 3,19 | 3,18 | 3,13 | 2,92 | 2,98 | 3,09 | 3,49 | 3,44 | 3,27 | 3,31 | 3,03 | 3,09 |
| p374.278@8.9  | C21H37CIN   | 2,46 | 2,15 | 2,91 | 3,13 | 3,22 | 3,36 | 2,26 | 2,21 | 2,69 | 2,70 | 2,42 | 2,44 |
| p375.281@10.3 | C24H34O2    | 2,41 | 2,41 | 2,34 | 2,15 | 2,20 | 2,33 | 2,72 | 2,70 | 2,50 | 2,50 | 2,27 | 2,27 |
| p375.289@12.1 |             | 2,36 | 2,39 | 2,62 | 2,51 | 2,57 | 2,62 | 2,51 | 2,58 | 2,54 | 2,60 | 2,43 | 2,35 |
| p376.294@12.1 | C22H43N5O13 | 1,74 | 1,82 | 2,02 | 1,94 | 2,02 | 2,09 | 1,93 | 2,03 | 2,00 | 2,08 | 1,80 | 1,85 |
| p377.325@15.3 | C27H40O11   | 2,16 | 2,16 | 2,12 | 2,17 | 2,16 | 2,11 | 2,11 | 2,15 | 2,16 | 2,21 | 2,21 | 2,17 |
| p378.339@15.3 |             | 1,75 | 1,83 | 1,78 | 1,78 | 1,87 | 1,79 | 1,80 | 1,77 | 1,68 | 1,76 | 1,93 | 1,74 |
| p384.232@6.9  |             | 1,82 | 2,23 | 2,06 | 1,82 | 1,81 | 2,07 | 1,99 | 1,94 | 1,81 | 1,71 | 1,86 | 1,73 |

|               |             |      |      |      |      |      |      |      |      |      |      |      |      |
|---------------|-------------|------|------|------|------|------|------|------|------|------|------|------|------|
| p385.292@14.6 |             | 1,82 | 1,72 | 1,84 | 1,77 | 1,79 | 1,89 | 1,93 | 1,85 | 1,83 | 1,82 | 1,79 | 1,71 |
| p387.252@9.1  | C45H70NO8P  | 1,77 | 1,80 | 2,13 | 1,87 | 1,50 | 1,65 | 1,48 | 0,91 | 1,74 | 2,11 | 2,71 | 2,36 |
| p389.268@9.6  |             | 3,48 | 3,48 | 3,60 | 3,35 | 3,15 | 3,26 | 3,23 | 3,20 | 3,38 | 3,59 | 3,63 | 3,55 |
| p390.272@9.6  | C44H80NO10P | 2,90 | 2,91 | 3,02 | 2,77 | 2,60 | 2,70 | 2,68 | 2,64 | 2,84 | 3,03 | 3,08 | 2,99 |
| p391.283@8.9  | C21H33FO    | 2,31 | 2,27 | 2,23 | 2,09 | 2,12 | 2,22 | 2,62 | 2,57 | 2,40 | 2,39 | 2,14 | 2,16 |
| p391.284@10.3 | C18H22O2    | 2,14 | 1,79 | 2,56 | 2,69 | 2,84 | 3,01 | 1,87 | 1,86 | 2,36 | 2,38 | 2,15 | 2,09 |
| p393.209@5.7  | C18H35NO    | 1,88 | 1,92 | 2,19 | 2,13 | 2,06 | 2,29 | 2,07 | 2,09 | 2,03 | 2,05 | 2,12 | 2,07 |
| p396.209@14   |             | 0,98 | 1,36 | 1,90 | 1,83 | 1,64 | 2,02 | 1,39 | 1,74 | 1,91 | 2,00 | 2,10 | 1,97 |
| p398.218@14   |             | 1,24 | 1,62 | 2,08 | 1,99 | 1,81 | 2,17 | 1,73 | 1,88 | 2,10 | 2,17 | 2,06 | 2,13 |
| p399.307@15.3 | C41H68O13   | 2,44 | 2,54 | 2,47 | 2,51 | 2,46 | 2,48 | 2,45 | 2,49 | 2,43 | 2,52 | 2,52 | 2,48 |
| p400.313@15.3 |             | 1,89 | 1,95 | 1,85 | 1,88 | 1,90 | 1,86 | 1,91 | 1,91 | 1,90 | 1,96 | 1,99 | 1,88 |
| p400.413@14.5 |             | 1,91 | 1,89 | 1,87 | 1,92 | 1,89 | 1,92 | 1,86 | 1,94 | 1,90 | 1,94 | 1,88 | 1,87 |
| p402.357@12.5 |             | 1,92 | 1,82 | 2,04 | 2,01 | 1,90 | 2,04 | 2,04 | 2,02 | 1,86 | 1,95 | 1,92 | 1,87 |
| p406.245@6.9  | C11H18N4O2  | 2,15 | 2,53 | 2,30 | 2,27 | 2,14 | 2,33 | 2,38 | 2,36 | 2,19 | 2,17 | 2,12 | 2,11 |
| p407.28@9.6   |             | 2,40 | 2,35 | 2,29 | 2,02 | 2,03 | 2,14 | 2,52 | 2,42 | 2,59 | 2,77 | 2,89 | 2,75 |
| p408.282@9.6  | C26H45N2O   | 1,80 | 1,70 | 1,79 | 1,34 | 1,48 | 1,67 | 1,96 | 1,92 | 2,01 | 2,17 | 2,34 | 2,20 |
| p409.184@5.7  |             | 1,61 | 1,63 | 2,03 | 1,87 | 1,81 | 2,06 | 1,88 | 1,90 | 1,81 | 1,87 | 1,94 | 1,87 |
| p412.282@9.2  |             | 2,66 | 2,52 | 0,93 | 0,91 | 0,00 | 0,00 | 2,91 | 2,64 | 0,00 | 0,70 | 0,00 | 0,00 |
| p413.266@17.1 |             | 2,12 | 2,14 | 2,09 | 2,14 | 2,16 | 2,14 | 2,22 | 2,14 | 2,07 | 2,24 | 2,18 | 2,18 |
| p414.43@14.9  |             | 2,42 | 2,39 | 2,43 | 2,40 | 2,43 | 2,41 | 2,43 | 2,42 | 2,42 | 2,42 | 2,42 | 2,39 |
| p415.252@7.3  |             | 2,73 | 2,64 | 2,99 | 2,90 | 2,91 | 3,11 | 2,93 | 2,90 | 2,96 | 2,95 | 2,78 | 2,13 |
| p415.253@5.9  |             | 2,45 | 2,48 | 2,76 | 2,62 | 2,63 | 2,75 | 2,68 | 2,71 | 2,58 | 2,62 | 2,51 | 2,56 |
| p421.352@15.3 |             | 2,10 | 2,10 | 2,10 | 2,07 | 2,04 | 1,94 | 2,00 | 2,03 | 2,12 | 2,13 | 2,13 | 2,06 |
| p422.375@15.3 |             | 2,01 | 2,03 | 1,96 | 1,97 | 1,96 | 1,92 | 1,93 | 2,02 | 1,88 | 1,99 | 2,02 | 1,89 |
| p426.242@6.9  | C20H31NO7   | 2,59 | 3,01 | 2,78 | 2,66 | 2,57 | 2,64 | 2,82 | 2,77 | 2,59 | 2,59 | 2,60 | 2,51 |
| p427.247@6.9  | C22H31NO2   | 1,74 | 2,15 | 1,98 | 1,88 | 1,69 | 1,83 | 1,98 | 1,92 | 1,75 | 1,80 | 1,75 | 1,68 |
| p428.259@7    |             | 2,27 | 2,69 | 2,40 | 2,31 | 2,32 | 2,32 | 2,41 | 2,34 | 2,34 | 2,31 | 2,33 | 2,23 |
| p429.262@9.6  |             | 2,14 | 2,19 | 2,16 | 1,84 | 1,83 | 1,82 | 2,23 | 2,17 | 2,38 | 2,52 | 2,69 | 2,57 |
| p429.319@14.6 |             | 1,76 | 1,82 | 1,87 | 1,87 | 1,84 | 1,93 | 1,92 | 1,96 | 1,90 | 1,93 | 1,93 | 1,94 |
| p430.294@9.2  |             | 2,45 | 2,30 | 1,44 | 0,66 | 0,78 | 0,00 | 2,69 | 2,43 | 1,84 | 1,99 | 2,14 | 2,09 |
| p430.39@13.3  |             | 1,62 | 1,57 | 1,73 | 1,81 | 1,64 | 1,86 | 1,75 | 1,75 | 1,70 | 1,70 | 1,64 | 1,72 |
| p431.278@10.3 | C18H26O2    | 2,05 | 2,07 | 1,96 | 1,79 | 1,75 | 1,87 | 2,33 | 2,32 | 2,18 | 2,18 | 1,83 | 1,95 |
| p432.281@5.9  |             | 1,62 | 1,64 | 2,18 | 1,98 | 2,04 | 2,15 | 2,03 | 1,98 | 2,07 | 2,04 | 2,02 | 2,05 |
| p437.235@5.9  |             | 2,17 | 2,19 | 2,52 | 2,37 | 2,33 | 2,51 | 2,46 | 2,48 | 2,30 | 2,28 | 2,42 | 2,37 |
| p438.378@15.3 |             | 1,56 | 1,68 | 1,64 | 1,63 | 1,50 | 1,39 | 1,62 | 1,61 | 1,59 | 1,66 | 1,64 | 1,60 |
| p443.334@15.3 |             | 2,48 | 2,53 | 2,46 | 2,48 | 2,52 | 2,46 | 2,45 | 2,49 | 2,44 | 2,51 | 2,51 | 2,48 |
| p444.338@15.3 |             | 1,92 | 1,94 | 1,97 | 1,93 | 1,93 | 1,90 | 1,86 | 1,96 | 1,89 | 2,01 | 1,93 | 1,92 |
| p447.254@10.3 |             | 1,89 | 1,91 | 1,79 | 1,60 | 1,68 | 1,83 | 2,13 | 2,13 | 1,99 | 2,07 | 1,75 | 1,90 |
| p448.257@7    | C34H40N4O4  | 2,63 | 2,96 | 2,82 | 2,67 | 2,62 | 2,79 | 2,73 | 2,68 | 2,68 | 2,65 | 2,71 | 2,60 |
| p449.259@7    | C49H80NO8P  | 1,87 | 2,15 | 1,92 | 1,82 | 1,83 | 2,00 | 1,99 | 1,75 | 1,93 | 1,83 | 1,80 | 1,75 |
| p450.272@7.1  |             | 2,21 | 2,54 | 2,32 | 2,26 | 2,20 | 2,48 | 2,29 | 2,13 | 2,22 | 2,27 | 2,24 | 2,16 |
| p453.211@5.9  |             | 1,98 | 2,04 | 2,26 | 2,15 | 2,14 | 2,30 | 2,21 | 2,33 | 2,14 | 2,19 | 2,21 | 2,20 |

|               |             |      |      |      |      |      |      |      |      |      |      |      |      |
|---------------|-------------|------|------|------|------|------|------|------|------|------|------|------|------|
| p454.336@10.3 |             | 1,75 | 1,72 | 1,80 | 1,60 | 1,45 | 1,48 | 2,12 | 2,00 | 1,84 | 1,89 | 1,24 | 1,01 |
| p455.245@5.8  |             | 2,26 | 2,30 | 2,60 | 2,51 | 2,48 | 2,65 | 2,53 | 2,51 | 2,50 | 2,41 | 2,41 | 2,45 |
| p456.348@11.9 |             | 2,25 | 2,24 | 2,31 | 2,16 | 2,25 | 2,33 | 2,02 | 1,93 | 1,78 | 1,75 | 1,45 | 1,34 |
| p459.279@6.1  |             | 2,67 | 2,71 | 2,93 | 2,82 | 2,91 | 3,09 | 2,88 | 2,83 | 2,95 | 2,91 | 2,96 | 2,93 |
| p459.281@7.4  |             | 2,60 | 2,52 | 2,84 | 2,64 | 2,65 | 2,88 | 2,85 | 2,83 | 2,66 | 2,73 | 2,74 | 2,42 |
| p465.377@15.3 |             | 2,03 | 1,99 | 1,90 | 1,95 | 1,93 | 1,94 | 1,89 | 1,84 | 1,99 | 1,92 | 2,03 | 1,94 |
| p466.404@15.3 |             | 2,01 | 2,00 | 1,92 | 1,94 | 1,98 | 1,88 | 1,95 | 1,92 | 1,92 | 1,86 | 1,95 | 1,88 |
| p468.348@10.7 | C25H36O10   | 1,96 | 1,89 | 2,02 | 1,79 | 1,38 | 1,62 | 2,36 | 2,24 | 1,77 | 1,71 | 1,28 | 1,33 |
| p470.27@7     | C13H21NO    | 2,68 | 2,58 | 2,62 | 2,51 | 2,68 | 2,62 | 2,32 | 2,39 | 2,05 | 2,08 | 1,96 | 1,92 |
| p470.363@12.4 |             | 2,48 | 2,85 | 2,67 | 2,59 | 2,54 | 2,88 | 2,79 | 2,71 | 2,58 | 2,52 | 2,55 | 2,49 |
| p471.27@7     | C14H20O2    | 2,19 | 2,11 | 2,18 | 2,07 | 2,21 | 2,11 | 1,91 | 1,85 | 1,56 | 1,64 | 1,14 | 1,56 |
| p471.367@12.4 |             | 1,70 | 2,07 | 1,95 | 1,84 | 1,85 | 2,09 | 2,06 | 1,97 | 1,73 | 1,67 | 1,81 | 1,68 |
| p472.285@7.1  |             | 1,75 | 2,04 | 1,99 | 1,84 | 1,83 | 2,24 | 2,12 | 1,97 | 1,84 | 1,80 | 1,82 | 1,72 |
| p472.33@10.3  |             | 2,02 | 1,91 | 1,97 | 1,71 | 1,76 | 1,84 | 2,16 | 2,06 | 1,87 | 1,88 | 1,42 | 1,31 |
| p473.344@14.5 |             | 1,77 | 1,67 | 1,84 | 1,84 | 1,82 | 1,78 | 1,75 | 1,78 | 1,72 | 1,80 | 1,83 | 1,74 |
| p476.307@6.1  | C41H76N2O15 | 2,00 | 2,05 | 2,44 | 2,24 | 2,23 | 2,50 | 2,36 | 2,29 | 2,32 | 2,32 | 2,37 | 2,38 |
| p477.232@5.8  | C14H16N2O3  | 2,04 | 2,04 | 2,47 | 2,36 | 2,26 | 2,42 | 2,34 | 2,27 | 2,19 | 2,17 | 2,27 | 2,21 |
| p478.353@10.8 | C15H22      | 2,27 | 2,33 | 1,86 | 1,87 | 1,21 | 1,03 | 1,97 | 1,98 | 1,60 | 1,54 | 0,00 | 0,00 |
| p480.341@8.8  | C24H34O2    | 1,59 | 1,51 | 1,62 | 1,60 | 1,63 | 1,74 | 1,72 | 1,68 | 1,64 | 1,65 | 1,62 | 1,63 |
| p481.262@6.1  |             | 2,12 | 2,29 | 2,22 | 2,19 | 2,22 | 2,48 | 2,22 | 2,19 | 2,28 | 2,25 | 2,23 | 2,19 |
| p481.276@7.2  |             | 2,38 | 2,33 | 2,62 | 2,42 | 2,35 | 2,63 | 2,62 | 2,58 | 2,30 | 2,34 | 2,41 | 2,37 |
| p482.265@6.1  | C13H17NO3   | 1,94 | 1,95 | 1,92 | 1,94 | 1,96 | 1,94 | 1,94 | 1,91 | 1,99 | 2,01 | 2,01 | 1,95 |
| p482.406@15.3 |             | 1,73 | 1,65 | 1,97 | 1,75 | 1,69 | 2,01 | 1,94 | 1,93 | 1,54 | 1,61 | 1,70 | 1,76 |
| p486.358@10.7 |             | 1,80 | 2,09 | 1,83 | 1,67 | 1,24 | 1,55 | 2,21 | 2,11 | 1,66 | 1,68 | 1,43 | 1,24 |
| p487.361@15.3 |             | 2,39 | 2,43 | 2,40 | 2,35 | 2,41 | 2,37 | 2,35 | 2,38 | 2,35 | 2,42 | 2,44 | 2,33 |
| p488.335@9.6  | C11H16O2    | 2,35 | 2,28 | 2,30 | 2,26 | 2,34 | 2,30 | 2,04 | 1,97 | 1,79 | 1,74 | 1,66 | 1,62 |
| p488.363@15.3 |             | 1,44 | 1,74 | 1,91 | 2,03 | 1,98 | 2,06 | 1,57 | 1,34 | 1,62 | 1,32 | 1,70 | 1,69 |
| p488.374@12.4 |             | 1,80 | 1,89 | 1,87 | 1,83 | 1,89 | 1,82 | 1,83 | 1,88 | 1,82 | 1,84 | 1,90 | 1,83 |
| p490.247@12.1 |             | 1,80 | 1,81 | 1,94 | 1,87 | 1,87 | 2,00 | 1,97 | 1,98 | 1,87 | 1,94 | 1,84 | 1,83 |
| p492.283@7.1  |             | 2,68 | 2,92 | 2,80 | 2,71 | 2,72 | 2,80 | 2,78 | 2,72 | 2,71 | 2,73 | 2,71 | 2,63 |
| p493.205@5.8  |             | 1,93 | 2,18 | 2,11 | 1,94 | 1,98 | 2,11 | 2,07 | 2,06 | 2,01 | 1,97 | 1,99 | 1,92 |
| p493.287@7.1  |             | 1,67 | 1,72 | 2,07 | 1,92 | 1,91 | 2,02 | 2,11 | 2,07 | 1,92 | 1,90 | 1,74 | 1,81 |
| p494.298@7.2  |             | 2,03 | 2,20 | 2,05 | 2,01 | 2,01 | 2,06 | 2,06 | 2,02 | 2,06 | 1,97 | 2,03 | 1,99 |
| p494.36@9     |             | 1,91 | 2,08 | 2,08 | 2,03 | 2,05 | 2,09 | 2,07 | 2,07 | 2,01 | 2,05 | 2,01 | 2,01 |
| p496.289@7.2  |             | 2,19 | 2,41 | 2,33 | 2,28 | 2,31 | 2,43 | 2,43 | 2,32 | 2,35 | 2,33 | 2,36 | 2,32 |
| p497.237@6.1  |             | 2,13 | 2,08 | 2,34 | 2,23 | 2,11 | 2,40 | 2,41 | 2,37 | 2,12 | 2,17 | 2,15 | 2,13 |
| p499.275@6    |             | 2,73 | 2,76 | 3,03 | 2,94 | 2,87 | 2,92 | 2,97 | 2,95 | 2,91 | 2,89 | 2,92 | 2,89 |
| p500.28@6     |             | 2,15 | 2,17 | 2,43 | 2,31 | 2,32 | 2,36 | 2,37 | 2,33 | 2,28 | 2,31 | 2,31 | 2,27 |
| p501.288@6.7  | C15H22O2    | 1,65 | 1,49 | 2,03 | 1,90 | 1,76 | 2,03 | 2,11 | 2,05 | 1,56 | 1,59 | 1,60 | 1,58 |
| p502.333@10.9 | C9H15NO2    | 1,67 | 1,83 | 2,06 | 2,09 | 2,11 | 2,04 | 1,47 | 1,39 | 1,70 | 1,68 | 1,73 | 1,73 |
| p502.353@10.1 |             | 2,16 | 2,18 | 2,04 | 1,71 | 1,53 | 1,43 | 2,42 | 2,39 | 2,11 | 1,94 | 1,26 | 1,40 |
| p503.307@6.2  |             | 3,10 | 3,10 | 3,32 | 3,16 | 3,17 | 3,18 | 3,32 | 3,20 | 3,18 | 3,20 | 3,20 | 3,18 |

|               |             |      |      |      |      |      |      |      |      |      |      |      |      |
|---------------|-------------|------|------|------|------|------|------|------|------|------|------|------|------|
| p504.311@6.2  |             | 2,79 | 2,70 | 2,66 | 2,60 | 2,66 | 2,61 | 2,47 | 2,54 | 2,30 | 2,34 | 1,85 | 1,75 |
| p504.35@12.5  |             | 2,53 | 2,53 | 2,71 | 2,61 | 2,55 | 2,56 | 2,73 | 2,61 | 2,62 | 2,59 | 2,59 | 2,52 |
| p505.311@6.2  | C24H36O3    | 2,31 | 2,27 | 2,27 | 2,11 | 2,28 | 2,15 | 2,12 | 2,06 | 1,82 | 1,98 | 1,39 | 1,03 |
| p505.353@12.5 |             | 1,90 | 1,85 | 2,09 | 1,97 | 1,91 | 1,97 | 2,09 | 1,99 | 1,95 | 1,98 | 1,95 | 1,91 |
| p506.244@10.3 |             | 1,87 | 1,80 | 1,98 | 1,88 | 1,94 | 2,01 | 2,05 | 1,99 | 1,82 | 1,93 | 1,85 | 1,83 |
| p509.406@15.2 |             | 1,81 | 1,84 | 1,70 | 1,77 | 1,64 | 1,76 | 1,85 | 1,82 | 1,79 | 1,91 | 1,82 | 1,79 |
| p510.433@15.3 |             | 2,32 | 2,52 | 2,52 | 2,44 | 2,47 | 2,76 | 2,58 | 2,53 | 2,49 | 2,40 | 2,42 | 2,42 |
| p510.63@7.3   |             | 1,86 | 1,86 | 1,82 | 1,83 | 1,85 | 1,86 | 1,88 | 1,86 | 1,82 | 1,84 | 1,95 | 1,73 |
| p511.299@7.3  |             | 1,87 | 2,02 | 2,13 | 2,02 | 2,08 | 2,37 | 2,16 | 2,10 | 2,04 | 2,06 | 2,05 | 2,02 |
| p514.296@7.1  |             | 2,50 | 2,69 | 2,66 | 2,55 | 2,55 | 2,82 | 2,58 | 2,54 | 2,58 | 2,58 | 2,61 | 2,50 |
| p515.299@7.1  |             | 1,84 | 2,02 | 1,89 | 1,83 | 1,82 | 2,11 | 1,90 | 1,77 | 1,87 | 1,79 | 1,94 | 1,82 |
| p516.301@6    |             | 1,89 | 1,93 | 2,29 | 2,21 | 2,10 | 2,36 | 2,17 | 2,16 | 2,32 | 2,25 | 2,17 | 2,23 |
| p517.37@14.5  | C41H64O13   | 1,47 | 1,49 | 1,63 | 1,50 | 1,51 | 1,67 | 1,73 | 1,41 | 1,45 | 1,60 | 1,51 | 1,36 |
| p520.333@6.2  |             | 2,54 | 2,52 | 2,82 | 2,67 | 2,66 | 2,78 | 2,79 | 2,66 | 2,80 | 2,71 | 2,70 | 2,73 |
| p521.258@6    | C30H48O10   | 2,42 | 2,46 | 2,75 | 2,56 | 2,54 | 2,64 | 2,61 | 2,63 | 2,55 | 2,56 | 2,64 | 2,64 |
| p521.397@8.9  | C11H18N2O3  | 2,36 | 2,33 | 2,21 | 2,21 | 1,85 | 1,88 | 2,43 | 2,30 | 1,94 | 2,01 | 1,78 | 1,72 |
| p522.26@6     | C12H24N2O4  | 2,56 | 2,49 | 2,44 | 2,34 | 2,50 | 2,44 | 2,23 | 2,30 | 2,11 | 2,18 | 1,60 | 1,54 |
| p522.359@12.5 |             | 1,81 | 1,91 | 2,07 | 1,99 | 1,86 | 2,05 | 2,11 | 2,07 | 2,01 | 1,98 | 2,05 | 2,04 |
| p523.299@6.8  | C21H36O5    | 2,14 | 2,20 | 2,51 | 2,31 | 2,19 | 2,21 | 2,56 | 2,46 | 2,14 | 2,15 | 2,26 | 2,07 |
| p525.289@6.2  | C32H53NO11S | 2,62 | 2,64 | 2,84 | 2,67 | 2,71 | 2,73 | 2,83 | 2,70 | 2,63 | 2,74 | 2,63 | 2,63 |
| p525.305@7.3  |             | 2,63 | 2,71 | 2,76 | 2,68 | 2,72 | 2,97 | 2,80 | 2,74 | 2,75 | 2,74 | 2,78 | 2,69 |
| p526.293@6.2  | C31H45NO8   | 2,09 | 2,21 | 2,08 | 2,13 | 2,08 | 2,10 | 2,17 | 2,17 | 2,12 | 2,22 | 2,12 | 2,18 |
| p526.432@15.2 |             | 2,02 | 2,04 | 2,27 | 2,09 | 2,15 | 2,13 | 2,27 | 2,08 | 2,04 | 2,12 | 1,99 | 2,07 |
| p528.366@8.2  |             | 1,83 | 1,81 | 1,84 | 1,87 | 1,78 | 2,13 | 1,77 | 1,76 | 1,78 | 2,04 | 1,90 | 1,84 |
| p530.3@7.1    |             | 2,96 | 3,12 | 1,53 | 1,54 | 0,96 | 1,05 | 3,15 | 3,06 | 0,85 | 1,31 | 0,61 | 0,48 |
| p531.274@12.1 |             | 2,28 | 2,22 | 2,45 | 2,33 | 2,40 | 2,47 | 2,42 | 2,39 | 2,31 | 2,32 | 2,32 | 2,32 |
| p531.388@15.2 | C24H50NO6P  | 2,22 | 2,31 | 2,25 | 2,28 | 2,27 | 2,37 | 2,32 | 2,24 | 2,29 | 2,33 | 2,26 | 2,23 |
| p532.277@12.1 |             | 1,66 | 1,82 | 1,69 | 1,79 | 1,75 | 1,68 | 1,83 | 1,75 | 1,74 | 1,81 | 1,60 | 1,77 |
| p532.392@15.2 |             | 1,77 | 1,77 | 1,94 | 1,87 | 1,94 | 1,97 | 2,00 | 1,95 | 1,91 | 1,85 | 1,80 | 1,83 |
| p533.272@12.1 |             | 1,94 | 1,92 | 2,10 | 1,97 | 1,99 | 2,06 | 2,08 | 2,13 | 1,95 | 2,04 | 1,99 | 1,96 |
| p536.309@7.2  |             | 2,44 | 2,58 | 2,55 | 2,23 | 2,54 | 2,68 | 2,62 | 2,53 | 2,49 | 2,49 | 2,49 | 2,48 |
| p537.232@6    |             | 2,13 | 2,15 | 2,37 | 2,25 | 2,12 | 2,33 | 2,35 | 2,30 | 2,18 | 2,19 | 2,23 | 2,21 |
| p540.314@7.3  | C9H11NO2    | 2,24 | 2,18 | 2,14 | 2,12 | 2,12 | 2,11 | 1,93 | 1,92 | 1,74 | 1,77 | 1,22 | 0,96 |
| p540.369@12.5 |             | 2,59 | 2,65 | 2,74 | 2,72 | 2,74 | 2,87 | 2,73 | 2,69 | 2,72 | 2,71 | 2,75 | 2,72 |
| p540.985@7.4  |             | 1,90 | 1,97 | 2,06 | 2,00 | 2,05 | 2,27 | 2,02 | 2,01 | 2,09 | 1,99 | 2,11 | 2,06 |
| p541.264@6.2  |             | 2,44 | 2,42 | 2,61 | 2,43 | 2,48 | 2,50 | 2,65 | 2,50 | 2,40 | 2,57 | 2,44 | 2,36 |
| p542.267@6.2  |             | 1,80 | 1,89 | 2,02 | 1,83 | 1,90 | 1,87 | 2,06 | 1,90 | 1,83 | 2,03 | 1,90 | 1,83 |
| p543.3@6.2    | C44H84NO8P  | 2,86 | 2,82 | 3,09 | 2,90 | 2,92 | 3,16 | 3,13 | 3,08 | 2,94 | 2,99 | 3,04 | 2,91 |
| p544.303@6.2  |             | 2,32 | 2,29 | 2,54 | 2,35 | 2,37 | 2,62 | 2,52 | 2,55 | 2,36 | 2,42 | 2,48 | 2,38 |
| p545.314@6.9  |             | 2,44 | 2,77 | 2,73 | 2,60 | 2,46 | 2,66 | 2,71 | 2,64 | 2,51 | 2,48 | 2,60 | 2,49 |
| p546.316@6.9  | C17H22O2    | 1,69 | 2,02 | 2,05 | 1,96 | 1,83 | 1,98 | 2,02 | 2,01 | 1,76 | 1,81 | 1,96 | 1,88 |
| p546.354@8    | C14H16N2O2  | 1,83 | 1,96 | 1,77 | 1,73 | 1,42 | 1,44 | 2,25 | 2,22 | 2,05 | 2,18 | 0,96 | 0,00 |

|               |             |      |      |      |      |      |      |      |      |      |      |      |      |
|---------------|-------------|------|------|------|------|------|------|------|------|------|------|------|------|
| p547.332@6.3  |             | 3,25 | 3,30 | 3,49 | 3,36 | 3,32 | 3,47 | 3,48 | 3,43 | 3,35 | 3,33 | 3,22 | 3,30 |
| p548.337@6.3  |             | 2,66 | 2,75 | 2,93 | 2,80 | 2,81 | 2,93 | 2,91 | 2,89 | 2,80 | 2,76 | 2,63 | 2,74 |
| p549.34@6.3   |             | 2,10 | 2,06 | 2,32 | 2,19 | 2,20 | 2,26 | 2,33 | 2,26 | 2,19 | 2,16 | 2,08 | 2,05 |
| p550.347@8.2  |             | 2,30 | 2,32 | 2,34 | 2,30 | 2,32 | 2,55 | 2,36 | 2,36 | 2,32 | 2,47 | 2,27 | 2,19 |
| p554.461@15.2 |             | 1,76 | 1,79 | 1,71 | 1,89 | 1,65 | 1,79 | 1,84 | 1,80 | 1,73 | 1,72 | 1,79 | 1,72 |
| p555.325@7.4  |             | 2,23 | 2,22 | 2,45 | 2,34 | 2,40 | 2,70 | 2,33 | 2,29 | 2,37 | 2,39 | 2,42 | 2,37 |
| p560.326@6.1  |             | 2,08 | 2,19 | 2,50 | 2,38 | 2,36 | 2,63 | 2,49 | 2,45 | 2,50 | 2,32 | 2,38 | 2,35 |
| p561.323@6.1  |             | 1,52 | 1,75 | 1,98 | 1,72 | 1,81 | 2,13 | 1,99 | 1,94 | 1,92 | 1,75 | 1,87 | 1,66 |
| p564.36@6.3   |             | 2,63 | 2,62 | 2,95 | 2,78 | 2,80 | 2,98 | 2,94 | 2,88 | 2,91 | 2,78 | 2,77 | 2,81 |
| p565.299@6.1  | C24H39N5O6  | 2,47 | 2,47 | 2,61 | 2,44 | 2,35 | 2,68 | 2,72 | 2,70 | 2,43 | 2,35 | 2,41 | 2,34 |
| p567.327@6.9  | C26H45NO7S  | 2,84 | 3,10 | 3,12 | 2,99 | 2,89 | 3,07 | 3,07 | 3,04 | 2,97 | 2,98 | 3,06 | 2,96 |
| p568.331@6.9  |             | 2,20 | 2,47 | 2,47 | 2,37 | 2,26 | 2,36 | 2,42 | 2,39 | 2,30 | 2,30 | 2,39 | 2,30 |
| p569.316@6.3  |             | 2,69 | 2,73 | 2,86 | 2,85 | 2,86 | 3,03 | 2,86 | 2,84 | 2,86 | 2,85 | 2,93 | 2,84 |
| p569.33@7.4   |             | 2,74 | 2,72 | 2,92 | 2,74 | 2,80 | 2,93 | 3,00 | 2,94 | 2,74 | 2,76 | 2,68 | 2,77 |
| p570.32@6.3   |             | 2,18 | 2,23 | 2,39 | 2,20 | 2,24 | 2,38 | 2,46 | 2,37 | 2,15 | 2,23 | 2,13 | 2,16 |
| p570.336@7.4  |             | 2,00 | 2,02 | 2,22 | 2,16 | 2,21 | 2,33 | 2,13 | 2,15 | 2,15 | 2,21 | 2,23 | 2,12 |
| p570.458@15.2 | C48H69NO12  | 2,27 | 2,22 | 2,20 | 2,25 | 2,24 | 2,14 | 2,18 | 2,23 | 2,21 | 2,25 | 2,24 | 2,20 |
| p571.318@5.7  |             | 2,78 | 2,68 | 2,37 | 2,35 | 2,19 | 2,44 | 2,31 | 2,28 | 2,15 | 2,11 | 2,03 | 1,97 |
| p571.462@15.2 | C25H30N6O2  | 1,74 | 1,83 | 1,72 | 1,77 | 1,78 | 1,67 | 1,61 | 1,76 | 1,85 | 1,78 | 1,75 | 1,73 |
| p575.338@7.4  |             | 2,28 | 2,29 | 2,29 | 2,24 | 2,26 | 2,25 | 2,17 | 2,25 | 2,26 | 2,27 | 2,26 | 2,26 |
| p575.414@15.2 |             | 1,50 | 1,62 | 1,79 | 1,79 | 1,70 | 1,99 | 1,76 | 1,69 | 1,79 | 1,75 | 1,87 | 1,81 |
| p576.417@15.2 |             | 1,70 | 1,79 | 1,78 | 1,84 | 1,84 | 1,85 | 1,74 | 1,84 | 1,77 | 1,79 | 1,79 | 1,79 |
| p578.378@8.9  | C13H8F2O3   | 2,39 | 2,18 | 2,68 | 2,72 | 2,82 | 2,89 | 2,25 | 2,24 | 2,60 | 2,61 | 2,44 | 2,48 |
| p579.382@8.9  | C24H34O3    | 1,91 | 1,57 | 2,26 | 2,26 | 2,33 | 2,44 | 1,78 | 1,83 | 2,14 | 1,99 | 1,93 | 2,00 |
| p581.258@6.1  |             | 2,19 | 2,23 | 2,35 | 2,22 | 2,04 | 2,37 | 2,43 | 2,42 | 2,07 | 1,99 | 2,05 | 1,99 |
| p582.323@4.8  |             | 2,38 | 2,39 | 1,49 | 1,14 | 0,00 | 0,00 | 2,35 | 2,28 | 0,00 | 0,00 | 0,00 | 0,00 |
| p584.34@7.5   |             | 2,61 | 2,56 | 2,78 | 2,77 | 2,79 | 2,93 | 2,71 | 2,72 | 2,73 | 2,76 | 2,84 | 2,78 |
| p585.291@6.3  |             | 2,54 | 2,55 | 2,73 | 2,54 | 2,55 | 2,71 | 2,81 | 2,75 | 2,53 | 2,60 | 2,46 | 2,56 |
| p586.293@6.3  |             | 1,99 | 2,03 | 2,19 | 2,09 | 2,09 | 2,19 | 2,26 | 2,23 | 1,92 | 2,01 | 1,99 | 1,99 |
| p587.327@6.3  |             | 3,34 | 3,37 | 3,54 | 3,43 | 3,40 | 3,47 | 3,53 | 3,49 | 3,46 | 3,43 | 3,44 | 3,39 |
| p588.333@6.3  |             | 2,84 | 2,84 | 3,02 | 2,88 | 2,88 | 2,96 | 3,02 | 2,95 | 2,96 | 2,92 | 2,89 | 2,86 |
| p589.339@7    |             | 3,08 | 3,31 | 3,34 | 3,21 | 3,18 | 3,34 | 3,26 | 3,16 | 3,21 | 3,23 | 3,29 | 3,20 |
| p590.345@7    |             | 2,44 | 2,70 | 2,72 | 2,60 | 2,58 | 2,74 | 2,63 | 2,57 | 2,60 | 2,58 | 2,65 | 2,56 |
| p591.36@6.5   |             | 3,18 | 3,13 | 3,46 | 3,23 | 3,22 | 3,43 | 3,33 | 3,30 | 3,20 | 3,29 | 3,32 | 3,21 |
| p592.364@6.5  |             | 2,65 | 2,64 | 2,92 | 2,69 | 2,68 | 2,90 | 2,78 | 2,80 | 2,68 | 2,74 | 2,80 | 2,66 |
| p593.365@6.5  |             | 2,09 | 2,08 | 2,38 | 2,10 | 2,01 | 2,28 | 2,21 | 2,17 | 2,10 | 2,15 | 2,17 | 2,07 |
| p598.355@7    |             | 1,56 | 1,77 | 1,86 | 1,71 | 1,72 | 1,85 | 1,78 | 1,71 | 1,91 | 1,87 | 1,83 | 1,87 |
| p598.487@15.2 | C18H36N6O5S | 1,72 | 1,70 | 1,63 | 1,70 | 1,70 | 1,68 | 1,75 | 1,70 | 1,61 | 1,61 | 1,73 | 1,65 |
| p599.35@7.5   |             | 2,07 | 2,10 | 2,40 | 2,34 | 2,36 | 2,62 | 2,27 | 2,17 | 2,24 | 2,34 | 2,35 | 2,35 |
| p600.329@7    |             | 1,68 | 1,94 | 1,91 | 1,74 | 1,69 | 1,95 | 1,83 | 1,69 | 1,76 | 1,77 | 1,80 | 1,69 |
| p604.297@5.7  |             | 2,56 | 2,54 | 2,85 | 2,75 | 2,69 | 2,90 | 2,78 | 2,77 | 2,89 | 2,80 | 2,80 | 2,77 |
| p604.355@6.3  | C6H10CIN5   | 2,41 | 2,42 | 1,40 | 1,20 | 0,31 | 1,05 | 2,67 | 2,64 | 0,00 | 0,00 | 0,00 | 0,00 |

|               |             |      |      |      |      |      |      |      |      |      |      |      |      |
|---------------|-------------|------|------|------|------|------|------|------|------|------|------|------|------|
| p605.303@5.7  |             | 2,01 | 2,09 | 2,36 | 2,28 | 2,23 | 2,41 | 2,27 | 2,23 | 2,38 | 2,25 | 2,25 | 2,27 |
| p605.357@6.3  |             | 2,05 | 1,99 | 0,00 | 0,75 | 0,00 | 0,00 | 2,18 | 2,18 | 0,00 | 0,00 | 0,00 | 0,00 |
| p608.387@6.5  |             | 2,71 | 2,71 | 3,00 | 2,81 | 2,79 | 3,03 | 2,85 | 2,81 | 2,92 | 2,91 | 2,91 | 2,84 |
| p609.31@6.3   |             | 2,18 | 2,12 | 2,52 | 2,32 | 2,35 | 2,55 | 2,43 | 2,33 | 2,41 | 2,40 | 2,40 | 2,39 |
| p609.386@6.5  | C33H48O9    | 2,73 | 2,73 | 2,89 | 2,76 | 2,75 | 2,88 | 2,91 | 2,83 | 2,77 | 2,74 | 2,70 | 2,75 |
| p610.314@6.3  |             | 2,11 | 2,19 | 2,35 | 2,24 | 2,21 | 2,38 | 2,40 | 2,37 | 2,27 | 2,14 | 2,24 | 2,23 |
| p611.352@7    |             | 3,31 | 3,56 | 3,55 | 3,45 | 3,44 | 3,61 | 3,49 | 3,42 | 3,48 | 3,49 | 3,52 | 3,45 |
| p612.357@7    |             | 2,70 | 2,99 | 2,98 | 2,86 | 2,85 | 3,04 | 2,90 | 2,83 | 2,88 | 2,88 | 2,90 | 2,88 |
| p613.342@6.5  |             | 2,62 | 2,62 | 2,85 | 2,67 | 2,67 | 2,86 | 2,81 | 2,77 | 2,61 | 2,63 | 2,67 | 2,60 |
| p613.355@7.5  |             | 2,49 | 2,48 | 2,77 | 2,67 | 2,69 | 2,89 | 2,58 | 2,63 | 2,67 | 2,70 | 2,71 | 2,69 |
| p614.346@6.5  |             | 2,14 | 2,20 | 2,17 | 2,12 | 2,16 | 2,24 | 2,23 | 2,24 | 2,16 | 2,29 | 2,19 | 2,17 |
| p614.359@7.5  | C16H35NO2   | 2,10 | 2,10 | 2,34 | 2,21 | 2,14 | 2,38 | 2,30 | 2,22 | 2,04 | 2,04 | 2,19 | 2,16 |
| p614.485@15.2 |             | 1,87 | 1,85 | 2,20 | 2,02 | 2,06 | 2,32 | 1,99 | 2,03 | 1,99 | 2,11 | 2,23 | 2,06 |
| p615.283@5.1  | C16H33NO    | 2,15 | 1,86 | 0,98 | 0,61 | 0,00 | 0,00 | 2,13 | 2,21 | 0,00 | 0,00 | 0,00 | 0,00 |
| p615.488@15.2 |             | 1,71 | 1,85 | 1,66 | 1,74 | 1,73 | 1,75 | 1,81 | 1,76 | 1,66 | 1,80 | 1,76 | 1,67 |
| p617.332@6.6  |             | 1,93 | 1,99 | 1,84 | 1,42 | 0,00 | 1,82 | 2,06 | 1,92 | 0,00 | 0,00 | 0,00 | 0,78 |
| p619.44@15.2  |             | 2,15 | 2,15 | 2,18 | 2,24 | 2,18 | 2,22 | 2,24 | 2,22 | 2,10 | 2,23 | 2,21 | 2,14 |
| p620.367@7    |             | 1,89 | 2,12 | 2,07 | 2,04 | 2,02 | 2,13 | 2,03 | 1,97 | 2,10 | 2,11 | 2,00 | 2,02 |
| p622.344@7    |             | 1,99 | 2,15 | 2,11 | 1,91 | 1,96 | 2,12 | 1,97 | 1,93 | 1,96 | 1,89 | 2,01 | 1,98 |
| p625.286@6.3  |             | 2,46 | 2,44 | 2,60 | 2,48 | 2,39 | 2,53 | 2,61 | 2,60 | 2,47 | 2,45 | 2,41 | 2,44 |
| p626.286@6.3  |             | 1,94 | 1,92 | 2,06 | 1,95 | 1,90 | 2,01 | 2,08 | 2,06 | 1,89 | 1,91 | 1,78 | 1,89 |
| p628.366@7.5  |             | 2,40 | 2,34 | 2,67 | 2,54 | 2,58 | 2,65 | 2,45 | 2,50 | 2,51 | 2,63 | 2,59 | 2,55 |
| p629.316@6.5  |             | 2,46 | 2,45 | 2,61 | 2,47 | 2,40 | 2,62 | 2,61 | 2,61 | 2,39 | 2,39 | 2,46 | 2,33 |
| p630.325@5.6  |             | 2,56 | 2,52 | 1,84 | 1,80 | 0,48 | 0,48 | 2,73 | 2,68 | 0,00 | 0,00 | 0,00 | 0,00 |
| p631.354@6.4  | C27H36O11   | 3,47 | 3,50 | 3,66 | 3,55 | 3,51 | 3,56 | 3,64 | 3,62 | 3,52 | 3,56 | 3,56 | 3,46 |
| p632.358@6.4  |             | 2,94 | 3,01 | 3,15 | 3,06 | 3,01 | 3,05 | 3,15 | 3,15 | 3,05 | 3,05 | 3,06 | 2,97 |
| p633.365@7.1  | C46H78NO10P | 3,45 | 3,66 | 3,69 | 3,58 | 3,59 | 3,82 | 3,58 | 3,51 | 3,61 | 3,64 | 3,68 | 3,59 |
| p634.37@7.1   |             | 2,85 | 3,11 | 3,13 | 2,99 | 2,99 | 3,26 | 3,03 | 2,89 | 3,05 | 3,05 | 3,09 | 3,03 |
| p635.385@6.6  |             | 3,33 | 3,26 | 3,51 | 3,34 | 3,34 | 3,49 | 3,40 | 3,32 | 3,36 | 3,39 | 3,45 | 3,29 |
| p636.389@6.6  |             | 2,84 | 2,73 | 3,01 | 2,85 | 2,82 | 2,97 | 2,87 | 2,82 | 2,80 | 2,90 | 2,95 | 2,78 |
| p637.392@6.6  |             | 2,28 | 2,17 | 2,44 | 2,29 | 2,22 | 2,40 | 2,36 | 2,25 | 2,27 | 2,28 | 2,38 | 2,18 |
| p638.323@7    |             | 1,57 | 1,99 | 1,81 | 1,70 | 1,51 | 1,80 | 1,92 | 1,73 | 1,54 | 1,63 | 1,66 | 1,57 |
| p642.382@7    |             | 1,97 | 2,18 | 2,21 | 2,10 | 2,12 | 2,34 | 2,10 | 2,12 | 2,22 | 2,28 | 2,28 | 2,33 |
| p642.708@7.6  |             | 2,14 | 2,08 | 2,38 | 2,31 | 2,34 | 2,60 | 2,26 | 2,33 | 2,32 | 2,33 | 2,38 | 2,29 |
| p643.376@7.6  |             | 1,94 | 1,89 | 2,22 | 2,09 | 2,14 | 2,39 | 2,09 | 2,12 | 2,11 | 2,15 | 2,15 | 2,07 |
| p644.356@7    |             | 1,92 | 2,15 | 2,08 | 2,09 | 1,95 | 2,29 | 2,09 | 2,01 | 2,03 | 1,91 | 2,05 | 1,96 |
| p648.381@6.4  |             | 2,68 | 2,69 | 2,97 | 2,89 | 2,83 | 2,93 | 2,92 | 2,92 | 2,98 | 2,93 | 2,88 | 2,83 |
| p649.384@6.4  |             | 2,23 | 2,26 | 2,53 | 2,37 | 2,37 | 2,41 | 2,45 | 2,43 | 2,47 | 2,39 | 2,40 | 2,31 |
| p650.383@6.4  |             | 1,66 | 1,64 | 1,92 | 1,73 | 1,70 | 1,89 | 1,93 | 1,87 | 1,90 | 1,80 | 1,75 | 1,78 |
| p652.413@6.6  |             | 2,82 | 2,80 | 3,08 | 2,95 | 2,93 | 3,12 | 2,97 | 2,90 | 3,06 | 2,97 | 3,03 | 2,92 |
| p653.338@6.4  |             | 2,79 | 2,81 | 2,94 | 2,84 | 2,79 | 2,87 | 2,98 | 2,89 | 2,80 | 2,80 | 2,82 | 2,73 |
| p654.342@6.4  |             | 2,34 | 2,33 | 2,43 | 2,38 | 2,31 | 2,33 | 2,50 | 2,47 | 2,32 | 2,30 | 2,25 | 2,26 |



|               |            |      |      |      |      |      |      |      |      |      |      |      |      |
|---------------|------------|------|------|------|------|------|------|------|------|------|------|------|------|
| p655.379@7.1  |            | 3,54 | 3,73 | 3,76 | 3,68 | 3,67 | 3,87 | 3,69 | 3,64 | 3,74 | 3,71 | 3,74 | 3,69 |
| p656.382@7.1  |            | 2,97 | 3,19 | 3,24 | 3,12 | 3,14 | 3,33 | 3,16 | 3,10 | 3,16 | 3,13 | 3,18 | 3,14 |
| p657.369@6.6  |            | 2,80 | 2,78 | 2,92 | 2,78 | 2,74 | 2,88 | 2,88 | 2,82 | 2,68 | 2,78 | 2,82 | 2,71 |
| p658.37@6.6   |            | 2,25 | 2,22 | 2,21 | 2,23 | 2,25 | 2,19 | 2,22 | 2,21 | 2,27 | 2,30 | 2,25 | 2,25 |
| p658.511@15.1 | C25H46NO7P | 2,34 | 2,23 | 2,47 | 2,30 | 2,24 | 2,42 | 2,42 | 2,33 | 2,22 | 2,30 | 2,31 | 2,21 |
| p659.34@6.3   | C9H11NO2   | 1,86 | 1,97 | 2,01 | 1,82 | 1,78 | 1,96 | 2,38 | 2,45 | 0,00 | 0,00 | 1,78 | 0,00 |
| p659.515@15.1 |            | 1,89 | 1,85 | 1,79 | 1,84 | 1,89 | 1,79 | 1,75 | 1,79 | 1,84 | 1,90 | 1,84 | 1,84 |
| p660.345@6.5  |            | 1,18 | 1,77 | 1,70 | 0,31 | 0,78 | 1,72 | 1,97 | 2,13 | 0,00 | 1,72 | 0,00 | 0,00 |
| p663.465@15.1 |            | 2,26 | 2,23 | 2,31 | 2,21 | 2,31 | 2,23 | 2,21 | 2,24 | 2,25 | 2,26 | 2,23 | 2,20 |
| p664.395@7.1  |            | 2,06 | 2,27 | 2,29 | 2,22 | 2,25 | 2,51 | 2,27 | 2,21 | 2,39 | 2,40 | 2,30 | 2,45 |
| p666.371@7.1  | C33H52O9   | 1,92 | 2,17 | 2,26 | 2,10 | 2,11 | 2,34 | 2,16 | 2,10 | 2,12 | 2,08 | 2,08 | 2,06 |
| p667.372@7.1  | C29H31NO2  | 1,54 | 1,73 | 1,71 | 1,73 | 1,48 | 1,81 | 1,80 | 1,59 | 1,60 | 1,68 | 1,47 | 1,63 |
| p669.316@6.4  | C24H36O2   | 2,70 | 2,75 | 2,66 | 2,55 | 2,45 | 2,42 | 2,71 | 2,69 | 2,44 | 2,47 | 2,43 | 2,39 |
| p670.319@6.4  |            | 2,19 | 2,25 | 2,16 | 2,01 | 1,88 | 1,88 | 2,21 | 2,19 | 1,90 | 1,97 | 2,03 | 1,93 |
| p672.394@7.6  |            | 1,89 | 1,97 | 2,24 | 2,13 | 2,17 | 2,31 | 2,22 | 2,12 | 2,07 | 2,22 | 2,20 | 2,04 |
| p673.341@6.6  |            | 2,56 | 2,63 | 2,66 | 2,60 | 2,45 | 2,63 | 2,68 | 2,59 | 2,47 | 2,47 | 2,54 | 2,44 |
| p674.345@6.6  |            | 2,12 | 2,11 | 2,26 | 2,00 | 1,98 | 2,18 | 2,21 | 2,12 | 2,08 | 2,03 | 2,02 | 1,94 |
| p675.379@6.5  |            | 3,52 | 3,53 | 3,66 | 3,56 | 3,58 | 3,61 | 3,64 | 3,57 | 3,57 | 3,60 | 3,55 | 3,52 |
| p676.385@6.5  |            | 3,03 | 3,05 | 3,19 | 3,02 | 3,09 | 3,13 | 3,17 | 3,11 | 3,10 | 3,12 | 3,11 | 3,00 |
| p677.392@7.1  |            | 3,58 | 3,71 | 3,79 | 3,70 | 3,72 | 3,92 | 3,68 | 3,63 | 3,72 | 3,74 | 3,77 | 3,71 |
| p678.395@7.1  |            | 3,05 | 3,20 | 3,26 | 3,16 | 3,19 | 3,42 | 3,17 | 3,11 | 3,22 | 3,24 | 3,27 | 3,17 |
| p679.405@7.1  |            | 2,27 | 2,37 | 2,40 | 2,39 | 2,39 | 2,67 | 2,32 | 2,28 | 2,27 | 2,43 | 2,53 | 2,39 |
| p679.412@6.7  |            | 3,29 | 3,24 | 3,39 | 3,30 | 3,29 | 3,42 | 3,34 | 3,33 | 3,27 | 3,29 | 3,39 | 3,18 |
| p680.416@6.7  |            | 2,79 | 2,75 | 2,91 | 2,84 | 2,83 | 2,95 | 2,89 | 2,86 | 2,78 | 2,85 | 2,92 | 2,79 |
| p681.418@6.7  |            | 2,20 | 2,22 | 2,35 | 2,22 | 2,21 | 2,36 | 2,32 | 2,29 | 2,23 | 2,28 | 2,35 | 2,21 |
| p686.733@7.6  | C29H40O9   | 1,70 | 1,59 | 2,13 | 1,89 | 1,98 | 2,07 | 1,95 | 1,83 | 1,75 | 1,93 | 1,99 | 1,77 |
| p688.383@7.1  |            | 2,06 | 2,16 | 2,21 | 2,11 | 2,04 | 2,37 | 2,19 | 2,01 | 2,08 | 2,09 | 2,13 | 2,08 |
| p689.385@7.1  |            | 1,61 | 1,72 | 1,81 | 1,58 | 1,57 | 1,82 | 1,60 | 1,56 | 1,61 | 1,63 | 1,72 | 1,58 |
| p691.37@7.7   |            | 1,98 | 1,95 | 2,43 | 2,34 | 2,18 | 2,36 | 2,18 | 1,99 | 2,10 | 2,12 | 1,75 | 1,75 |
| p692.408@6.5  |            | 2,80 | 2,81 | 3,00 | 2,91 | 2,90 | 3,01 | 2,96 | 2,87 | 3,05 | 2,94 | 2,93 | 2,92 |
| p693.411@6.5  |            | 2,34 | 2,33 | 2,57 | 2,46 | 2,49 | 2,56 | 2,50 | 2,43 | 2,60 | 2,43 | 2,45 | 2,46 |
| p696.439@6.7  | C27H50O6   | 2,86 | 2,88 | 2,98 | 2,91 | 2,92 | 3,10 | 2,97 | 2,97 | 3,06 | 2,99 | 2,97 | 2,91 |
| p697.384@6.5  | C44H80NO8P | 2,79 | 2,77 | 2,83 | 2,81 | 2,85 | 2,82 | 2,90 | 2,88 | 2,81 | 2,83 | 2,79 | 2,74 |
| p698.368@6.5  |            | 2,33 | 2,31 | 2,46 | 2,28 | 2,31 | 2,36 | 2,46 | 2,36 | 2,31 | 2,38 | 2,32 | 2,18 |
| p699.404@7.2  |            | 3,61 | 3,71 | 3,84 | 3,73 | 3,76 | 3,91 | 3,78 | 3,71 | 3,76 | 3,76 | 3,82 | 3,77 |
| p70.211@7.4   |            | 2,08 | 2,05 | 2,35 | 2,23 | 2,34 | 2,37 | 2,15 | 2,26 | 2,29 | 2,41 | 2,47 | 2,33 |
| p700.408@7.2  |            | 3,12 | 3,21 | 3,34 | 3,23 | 3,29 | 3,43 | 3,29 | 3,22 | 3,28 | 3,27 | 3,34 | 3,28 |
| p701.393@6.7  |            | 2,34 | 2,40 | 2,60 | 2,47 | 2,42 | 2,52 | 2,55 | 2,55 | 2,54 | 2,50 | 2,49 | 2,53 |
| p701.412@7.2  |            | 2,78 | 2,77 | 2,83 | 2,74 | 2,75 | 2,86 | 2,86 | 2,90 | 2,68 | 2,72 | 2,77 | 2,66 |
| p702.397@6.7  | C21H36     | 2,35 | 2,30 | 2,40 | 2,34 | 2,27 | 2,42 | 2,42 | 2,41 | 2,25 | 2,27 | 2,34 | 2,17 |
| p702.533@15.1 |            | 2,16 | 2,15 | 2,21 | 2,15 | 2,20 | 2,25 | 2,19 | 2,23 | 2,17 | 2,20 | 2,12 | 2,15 |
| p703.395@6.7  |            | 1,81 | 1,65 | 1,83 | 1,78 | 1,75 | 1,90 | 1,80 | 1,89 | 1,63 | 1,79 | 1,83 | 1,73 |

|               |              |      |      |      |      |      |      |      |      |      |      |      |      |
|---------------|--------------|------|------|------|------|------|------|------|------|------|------|------|------|
| p704.358@7.1  |              | 1,66 | 1,78 | 1,79 | 1,53 | 1,62 | 1,90 | 1,74 | 1,83 | 1,47 | 1,66 | 1,73 | 1,56 |
| p705.377@7.1  |              | 1,87 | 1,98 | 1,84 | 1,66 | 1,62 | 1,97 | 1,73 | 1,80 | 1,60 | 1,59 | 1,58 | 1,45 |
| p707.493@15.1 |              | 2,11 | 2,11 | 2,23 | 2,18 | 2,16 | 2,24 | 2,18 | 2,20 | 2,08 | 2,14 | 2,12 | 2,08 |
| p708.493@15.1 | C16H2002     | 1,79 | 1,78 | 1,82 | 1,81 | 1,77 | 1,89 | 1,90 | 1,88 | 1,77 | 1,78 | 1,65 | 1,76 |
| p710.398@7.2  |              | 2,06 | 2,15 | 2,28 | 2,14 | 2,15 | 2,34 | 2,19 | 2,15 | 2,18 | 2,13 | 2,23 | 2,12 |
| p713.337@6.5  | C25H42NO7P   | 2,50 | 2,51 | 2,55 | 2,47 | 2,49 | 2,49 | 2,61 | 2,55 | 2,41 | 2,47 | 2,41 | 2,40 |
| p714.341@6.5  |              | 2,07 | 1,99 | 1,83 | 2,07 | 1,88 | 2,04 | 2,18 | 2,15 | 1,90 | 1,98 | 2,04 | 1,97 |
| p717.367@6.7  | C24H38O5     | 2,54 | 2,57 | 2,60 | 2,54 | 2,54 | 2,58 | 2,62 | 2,66 | 2,46 | 2,51 | 2,52 | 2,44 |
| p718.372@6.7  | C19H27NO     | 2,11 | 2,09 | 2,18 | 2,08 | 2,07 | 2,14 | 2,13 | 2,28 | 1,94 | 1,95 | 2,08 | 1,77 |
| p719.407@6.6  |              | 3,48 | 3,51 | 3,63 | 3,54 | 3,54 | 3,62 | 3,62 | 3,55 | 3,52 | 3,58 | 3,53 | 3,42 |
| p720.41@6.6   |              | 3,08 | 3,04 | 3,18 | 3,09 | 3,06 | 3,17 | 3,19 | 3,10 | 3,10 | 3,16 | 3,11 | 3,01 |
| p721.417@7.2  |              | 3,53 | 3,61 | 3,71 | 3,65 | 3,66 | 3,87 | 3,60 | 3,57 | 3,68 | 3,74 | 3,73 | 3,67 |
| p722.422@7.2  |              | 3,02 | 3,13 | 3,23 | 3,17 | 3,19 | 3,38 | 3,10 | 3,09 | 3,18 | 3,27 | 3,25 | 3,17 |
| p723.43@7.2   | C39H63N5O12  | 2,19 | 2,47 | 2,50 | 2,37 | 2,45 | 2,61 | 2,33 | 2,28 | 2,36 | 2,46 | 2,47 | 2,27 |
| p723.438@6.8  |              | 1,65 | 1,61 | 1,86 | 1,82 | 1,54 | 1,78 | 1,78 | 1,88 | 1,71 | 1,56 | 1,59 | 1,61 |
| p723.472@15.1 | C34H47NO10   | 3,08 | 3,03 | 3,25 | 3,12 | 3,06 | 3,23 | 3,13 | 3,09 | 3,07 | 3,17 | 3,22 | 3,06 |
| p724.443@6.8  |              | 2,65 | 2,56 | 2,84 | 2,70 | 2,67 | 2,74 | 2,68 | 2,65 | 2,63 | 2,70 | 2,76 | 2,58 |
| p725.445@6.8  |              | 2,05 | 1,95 | 2,24 | 2,09 | 2,15 | 2,28 | 2,18 | 2,10 | 2,05 | 2,18 | 2,23 | 2,00 |
| p726.37@7.2   | C29H33CIN2O2 | 1,72 | 1,71 | 1,81 | 1,67 | 1,58 | 1,85 | 1,85 | 1,71 | 1,63 | 1,63 | 1,68 | 1,72 |
| p730.433@7.2  |              | 2,07 | 2,31 | 2,38 | 2,34 | 2,36 | 2,63 | 2,25 | 2,31 | 2,41 | 2,37 | 2,41 | 2,42 |
| p732.409@7.2  |              | 2,02 | 2,11 | 2,11 | 2,02 | 2,07 | 2,31 | 2,06 | 2,01 | 2,05 | 2,12 | 2,03 | 2,09 |
| p735.422@7.4  | C29H44O12    | 1,63 | 1,57 | 1,78 | 1,67 | 1,78 | 1,97 | 1,75 | 1,62 | 1,82 | 1,76 | 1,86 | 1,78 |
| p736.433@6.6  |              | 2,81 | 2,84 | 3,01 | 2,89 | 2,90 | 3,03 | 2,99 | 2,91 | 3,03 | 2,93 | 2,93 | 2,89 |
| p737.437@6.6  |              | 2,42 | 2,40 | 2,56 | 2,48 | 2,52 | 2,63 | 2,53 | 2,53 | 2,59 | 2,56 | 2,53 | 2,41 |
| p738.441@6.6  |              | 1,87 | 1,79 | 2,11 | 1,91 | 1,79 | 2,09 | 2,07 | 1,94 | 2,01 | 1,99 | 1,88 | 1,77 |
| p740.465@6.8  |              | 2,72 | 2,71 | 2,97 | 2,84 | 2,83 | 2,94 | 2,78 | 2,78 | 2,88 | 2,91 | 2,92 | 2,85 |
| p741.405@6.6  | C26H52NO7P   | 2,78 | 2,75 | 2,92 | 2,78 | 2,75 | 2,87 | 2,96 | 2,89 | 2,79 | 2,71 | 2,78 | 2,69 |
| p742.393@6.6  |              | 2,35 | 2,37 | 2,46 | 2,36 | 2,24 | 2,36 | 2,51 | 2,41 | 2,27 | 2,37 | 2,37 | 2,26 |
| p743.43@7.2   |              | 3,55 | 3,65 | 3,73 | 3,68 | 3,70 | 3,78 | 3,70 | 3,64 | 3,73 | 3,73 | 3,76 | 3,70 |
| p744.434@7.2  | C28H38O6     | 3,10 | 3,18 | 3,29 | 3,22 | 3,24 | 3,32 | 3,25 | 3,18 | 3,30 | 3,31 | 3,32 | 3,25 |
| p745.419@6.8  |              | 2,31 | 2,46 | 2,48 | 2,43 | 2,44 | 2,49 | 2,47 | 2,38 | 2,46 | 2,43 | 2,46 | 2,48 |
| p745.437@7.2  |              | 2,68 | 2,66 | 2,85 | 2,66 | 2,62 | 2,76 | 2,78 | 2,71 | 2,63 | 2,69 | 2,75 | 2,62 |
| p746.423@6.8  |              | 2,25 | 2,07 | 2,36 | 2,21 | 2,23 | 2,32 | 2,32 | 2,31 | 2,21 | 2,30 | 2,32 | 2,21 |
| p746.563@15   |              | 1,99 | 1,90 | 1,80 | 1,91 | 1,87 | 1,89 | 1,88 | 1,94 | 1,88 | 1,91 | 1,86 | 1,88 |
| p747.566@15   |              | 1,68 | 1,51 | 1,63 | 1,31 | 1,64 | 1,52 | 1,26 | 1,48 | 1,62 | 1,55 | 1,37 | 1,65 |
| p749.395@7.9  |              | 1,84 | 1,81 | 1,83 | 1,75 | 1,76 | 1,73 | 1,98 | 1,91 | 1,74 | 1,78 | 1,77 | 1,65 |
| p751.368@6.9  |              | 1,97 | 1,99 | 1,99 | 2,04 | 1,88 | 1,97 | 1,91 | 1,98 | 1,87 | 1,97 | 1,85 | 1,89 |
| p751.513@15   |              | 2,20 | 2,36 | 0,61 | 0,00 | 0,00 | 0,48 | 2,40 | 2,38 | 0,00 | 0,00 | 0,00 | 0,00 |
| p752.445@7.2  |              | 2,04 | 2,38 | 2,39 | 2,47 | 2,52 | 2,54 | 2,26 | 2,35 | 2,57 | 2,37 | 2,50 | 2,47 |
| p753.453@7.2  | C30H44O10    | 1,48 | 1,61 | 1,59 | 1,72 | 1,70 | 1,60 | 1,78 | 1,71 | 1,78 | 1,69 | 1,75 | 1,69 |
| p754.425@7.2  | C17H35N5O5   | 2,10 | 2,15 | 2,13 | 2,14 | 2,12 | 2,22 | 2,19 | 2,15 | 2,15 | 2,18 | 2,11 | 2,13 |
| p755.394@6.3  | C10H9N       | 2,66 | 2,74 | 1,83 | 1,73 | 0,00 | 0,00 | 2,51 | 2,57 | 0,00 | 0,00 | 0,00 | 0,00 |

|               |             |      |      |      |      |      |      |      |      |      |      |      |      |
|---------------|-------------|------|------|------|------|------|------|------|------|------|------|------|------|
| p757.366@6.6  |             | 2,47 | 2,52 | 2,59 | 2,42 | 2,39 | 2,45 | 2,59 | 2,51 | 2,36 | 2,44 | 2,40 | 2,32 |
| p758.371@6.6  | C19H34O3    | 1,95 | 2,24 | 2,09 | 2,04 | 2,00 | 2,07 | 2,24 | 2,15 | 1,94 | 1,98 | 1,97 | 1,86 |
| p759.406@6.9  |             | 1,68 | 1,76 | 2,01 | 0,00 | 0,00 | 1,79 | 1,92 | 1,84 | 0,00 | 0,00 | 1,79 | 0,00 |
| p761.397@6.8  |             | 2,48 | 2,39 | 2,52 | 2,41 | 2,39 | 2,48 | 2,58 | 2,49 | 2,48 | 2,38 | 2,46 | 2,35 |
| p762.403@6.8  |             | 2,05 | 2,02 | 2,12 | 2,03 | 1,96 | 2,07 | 2,14 | 2,07 | 2,06 | 1,89 | 2,10 | 1,96 |
| p763.432@6.7  |             | 3,41 | 3,39 | 3,46 | 3,45 | 3,45 | 3,46 | 3,50 | 3,50 | 3,45 | 3,49 | 3,48 | 3,38 |
| p764.437@6.7  | C43H75NO16  | 3,01 | 2,96 | 3,06 | 3,01 | 3,04 | 3,01 | 3,08 | 3,06 | 3,04 | 3,03 | 3,06 | 2,98 |
| p765.443@7.3  |             | 3,30 | 3,44 | 3,52 | 3,49 | 3,55 | 3,75 | 3,57 | 3,48 | 3,57 | 3,52 | 3,54 | 3,55 |
| p766.447@7.3  |             | 2,91 | 2,99 | 3,10 | 3,06 | 3,12 | 3,32 | 3,14 | 3,12 | 3,16 | 3,03 | 3,06 | 3,11 |
| p767.455@7.3  |             | 2,16 | 2,12 | 2,31 | 2,27 | 2,33 | 2,47 | 2,35 | 2,28 | 2,27 | 2,32 | 2,39 | 2,27 |
| p767.465@6.9  |             | 2,11 | 2,18 | 2,34 | 2,19 | 2,34 | 2,38 | 2,23 | 2,29 | 2,34 | 2,41 | 2,21 | 2,19 |
| p767.584@12.1 |             | 2,75 | 2,90 | 2,98 | 2,78 | 2,76 | 3,01 | 3,01 | 2,87 | 2,78 | 2,83 | 2,89 | 2,66 |
| p768.47@6.9   | C28H52NO7P  | 2,27 | 2,47 | 2,54 | 2,42 | 2,40 | 2,64 | 2,60 | 2,47 | 2,43 | 2,40 | 2,47 | 2,26 |
| p768.585@12.1 |             | 1,84 | 1,94 | 2,10 | 2,03 | 2,09 | 2,12 | 1,98 | 2,05 | 2,04 | 2,18 | 1,97 | 1,89 |
| p769.471@6.9  | C33H50N4O6S | 1,67 | 1,97 | 2,03 | 1,85 | 1,78 | 2,12 | 2,02 | 1,83 | 1,82 | 1,91 | 1,94 | 1,64 |
| p776.438@7.3  | C41H66O13   | 1,92 | 2,04 | 2,02 | 1,97 | 1,95 | 2,12 | 2,02 | 1,99 | 2,00 | 1,97 | 1,92 | 1,93 |
| p777.529@9.6  |             | 1,82 | 1,80 | 1,94 | 1,62 | 1,37 | 1,49 | 1,48 | 1,24 | 1,70 | 1,89 | 1,89 | 1,78 |
| p779.449@7.4  |             | 1,44 | 1,35 | 1,77 | 1,63 | 1,76 | 1,86 | 1,70 | 1,57 | 1,74 | 1,74 | 1,87 | 1,79 |
| p780.459@6.7  |             | 2,81 | 2,76 | 2,91 | 2,87 | 2,86 | 2,93 | 2,93 | 2,92 | 2,99 | 2,93 | 2,92 | 2,87 |
| p781.461@6.7  | C17H35NO    | 2,68 | 2,64 | 2,55 | 2,39 | 2,41 | 2,50 | 2,99 | 2,94 | 2,76 | 2,82 | 2,53 | 2,57 |
| p781.565@10.3 |             | 2,34 | 2,36 | 2,53 | 2,50 | 2,47 | 2,50 | 2,54 | 2,57 | 2,63 | 2,51 | 2,52 | 2,44 |
| p782.467@6.7  |             | 2,41 | 2,41 | 2,29 | 2,10 | 2,17 | 2,20 | 2,73 | 2,70 | 2,51 | 2,52 | 2,25 | 2,34 |
| p782.568@10.3 |             | 1,96 | 1,76 | 2,04 | 2,07 | 1,98 | 2,04 | 2,05 | 2,06 | 2,08 | 2,05 | 1,96 | 1,89 |
| p783.569@10.3 |             | 1,80 | 1,92 | 1,81 | 1,32 | 1,60 | 1,74 | 2,19 | 2,13 | 2,02 | 1,96 | 1,74 | 1,80 |
| p784.492@6.9  |             | 2,46 | 2,66 | 2,78 | 2,64 | 2,51 | 2,83 | 2,75 | 2,62 | 2,69 | 2,61 | 2,62 | 2,51 |
| p785.426@6.7  |             | 2,70 | 2,74 | 2,75 | 2,74 | 2,73 | 2,76 | 2,86 | 2,85 | 2,75 | 2,73 | 2,75 | 2,62 |
| p785.593@12.1 |             | 2,93 | 3,00 | 3,17 | 3,06 | 3,14 | 3,20 | 3,06 | 3,15 | 3,10 | 3,22 | 3,01 | 2,94 |
| p786.421@6.7  |             | 2,36 | 2,25 | 2,40 | 2,28 | 2,34 | 2,37 | 2,47 | 2,40 | 2,35 | 2,38 | 2,38 | 2,27 |
| p786.597@12.1 |             | 2,70 | 2,71 | 2,87 | 2,80 | 2,90 | 2,89 | 2,79 | 2,89 | 2,88 | 2,95 | 2,70 | 2,71 |
| p787.456@7.3  |             | 3,34 | 3,38 | 3,57 | 3,54 | 3,56 | 3,72 | 3,48 | 3,44 | 3,58 | 3,57 | 3,62 | 3,56 |
| p787.6@12.1   | C19H37N5O6  | 2,20 | 2,18 | 2,35 | 2,27 | 2,38 | 2,41 | 2,26 | 2,38 | 2,37 | 2,42 | 2,21 | 2,22 |
| p788.461@7.3  |             | 2,96 | 2,96 | 3,18 | 3,12 | 3,17 | 3,32 | 3,09 | 3,02 | 3,18 | 3,17 | 3,21 | 3,12 |
| p789.447@6.9  |             | 2,51 | 2,61 | 2,69 | 2,52 | 2,51 | 2,74 | 2,68 | 2,54 | 2,56 | 2,53 | 2,52 | 2,33 |
| p789.465@7.3  |             | 2,19 | 2,21 | 2,36 | 2,46 | 2,33 | 2,49 | 2,29 | 2,21 | 2,39 | 2,38 | 2,42 | 2,30 |
| p790.451@6.9  |             | 2,08 | 2,15 | 2,27 | 2,14 | 2,15 | 2,35 | 2,34 | 2,21 | 2,15 | 2,11 | 2,09 | 2,10 |
| p794.46@7.5   |             | 1,44 | 1,07 | 1,81 | 1,69 | 1,69 | 1,97 | 1,61 | 1,62 | 1,77 | 1,72 | 1,88 | 1,83 |
| p795.542@9.6  | C45H72O2O   | 2,62 | 2,59 | 2,74 | 2,48 | 2,18 | 2,40 | 2,25 | 2,24 | 2,51 | 2,70 | 2,79 | 2,69 |
| p796.549@9.6  |             | 2,38 | 2,25 | 2,52 | 2,20 | 1,94 | 2,08 | 1,98 | 1,85 | 2,24 | 2,46 | 2,55 | 2,44 |
| p797.552@9.6  |             | 1,87 | 1,88 | 1,96 | 1,70 | 1,50 | 1,63 | 1,45 | 1,35 | 1,60 | 1,94 | 1,95 | 1,94 |
| p798.45@7.3   | C30H42O7    | 1,99 | 1,91 | 2,17 | 2,08 | 2,04 | 2,22 | 2,06 | 2,05 | 2,08 | 2,04 | 2,08 | 2,09 |
| p799.572@10.3 |             | 3,33 | 3,29 | 3,19 | 2,97 | 3,07 | 3,12 | 3,60 | 3,56 | 3,40 | 3,44 | 3,12 | 3,19 |
| p800.577@10.3 |             | 3,03 | 3,00 | 2,93 | 2,69 | 2,78 | 2,88 | 3,32 | 3,28 | 3,13 | 3,16 | 2,87 | 2,91 |

|               |            |      |      |      |      |      |      |      |      |      |      |      |      |
|---------------|------------|------|------|------|------|------|------|------|------|------|------|------|------|
| p801.391@6.7  |            | 2,52 | 2,49 | 2,42 | 2,20 | 2,31 | 2,39 | 2,78 | 2,74 | 2,67 | 2,65 | 2,36 | 2,43 |
| p801.581@10.3 |            | 2,39 | 2,44 | 2,47 | 2,36 | 2,37 | 2,40 | 2,57 | 2,50 | 2,35 | 2,44 | 2,42 | 2,31 |
| p802.395@6.7  | C20H24O2   | 1,87 | 1,80 | 1,69 | 1,53 | 1,54 | 1,75 | 2,16 | 2,14 | 1,89 | 1,99 | 1,63 | 1,74 |
| p802.585@10.3 |            | 1,97 | 2,04 | 2,02 | 2,00 | 1,93 | 1,75 | 2,20 | 2,20 | 1,98 | 1,86 | 1,75 | 1,89 |
| p804.481@7.3  |            | 1,60 | 1,63 | 1,85 | 1,62 | 1,80 | 1,89 | 1,68 | 1,77 | 1,83 | 1,78 | 1,84 | 1,94 |
| p805.421@6.9  |            | 2,36 | 2,40 | 2,38 | 2,28 | 2,24 | 2,44 | 2,53 | 2,42 | 2,26 | 2,30 | 2,28 | 2,39 |
| p807.458@6.8  |            | 3,29 | 3,27 | 3,42 | 3,32 | 3,32 | 3,22 | 3,40 | 3,32 | 3,32 | 3,32 | 3,37 | 3,26 |
| p807.577@12.1 |            | 1,74 | 1,81 | 1,94 | 1,82 | 1,93 | 1,92 | 1,89 | 1,86 | 1,90 | 1,92 | 1,83 | 1,82 |
| p808.463@6.8  |            | 2,89 | 2,85 | 3,05 | 2,93 | 2,90 | 2,81 | 3,01 | 2,89 | 2,91 | 2,96 | 2,97 | 2,90 |
| p809.469@7.3  |            | 3,27 | 3,24 | 3,50 | 3,43 | 3,47 | 3,59 | 3,40 | 3,33 | 3,49 | 3,49 | 3,49 | 3,47 |
| p810.474@7.3  |            | 2,87 | 2,84 | 3,12 | 3,03 | 3,07 | 3,22 | 3,00 | 2,96 | 3,09 | 3,12 | 3,14 | 3,07 |
| p811.481@7.3  |            | 2,07 | 2,01 | 2,29 | 2,25 | 2,37 | 2,36 | 2,18 | 2,18 | 2,30 | 2,37 | 2,36 | 2,29 |
| p811.492@6.9  |            | 2,78 | 2,97 | 2,94 | 2,90 | 2,90 | 2,91 | 2,96 | 2,93 | 2,89 | 2,94 | 2,88 | 2,79 |
| p812.497@6.9  |            | 2,51 | 2,62 | 2,53 | 2,45 | 2,50 | 2,59 | 2,52 | 2,54 | 2,51 | 2,53 | 2,49 | 2,48 |
| p813.435@5.8  | C11H12N2O2 | 2,32 | 2,38 | 1,45 | 1,18 | 0,00 | 0,85 | 2,59 | 2,58 | 0,00 | 0,00 | 0,31 | 0,00 |
| p813.552@9.6  |            | 3,31 | 3,32 | 3,43 | 3,12 | 2,93 | 3,09 | 2,96 | 2,92 | 3,19 | 3,44 | 3,44 | 3,34 |
| p814.556@9.6  |            | 3,01 | 3,05 | 3,14 | 2,86 | 2,67 | 2,81 | 2,67 | 2,70 | 2,92 | 3,17 | 3,17 | 3,04 |
| p815.558@9.6  |            | 2,49 | 2,48 | 2,62 | 2,40 | 2,21 | 2,34 | 2,17 | 2,17 | 2,42 | 2,60 | 2,65 | 2,58 |
| p816.562@9.6  | C39H62O12  | 1,92 | 1,95 | 1,98 | 1,39 | 1,61 | 1,25 | 1,21 | 1,15 | 1,78 | 1,91 | 1,96 | 1,95 |
| p817.581@10.3 |            | 3,71 | 3,67 | 3,62 | 3,40 | 3,51 | 3,63 | 3,97 | 3,92 | 3,78 | 3,85 | 3,55 | 3,62 |
| p817.984@7.3  |            | 2,26 | 2,23 | 2,47 | 2,39 | 2,44 | 2,60 | 2,41 | 2,37 | 2,58 | 2,40 | 2,48 | 2,44 |
| p818.587@10.3 |            | 3,44 | 3,42 | 3,34 | 3,14 | 3,24 | 3,35 | 3,71 | 3,67 | 3,51 | 3,59 | 3,28 | 3,34 |
| p819.591@10.3 |            | 2,92 | 2,87 | 2,82 | 2,63 | 2,72 | 2,85 | 3,22 | 3,16 | 2,98 | 3,04 | 2,73 | 2,86 |
| p820.463@7.3  |            | 2,27 | 2,32 | 2,25 | 2,01 | 2,12 | 2,16 | 2,56 | 2,55 | 2,43 | 2,50 | 2,17 | 2,19 |
| p820.595@10.3 |            | 2,02 | 1,94 | 2,08 | 2,02 | 2,02 | 2,20 | 1,99 | 1,99 | 2,09 | 2,00 | 2,13 | 2,10 |
| p821.444@7.1  |            | 1,72 | 1,57 | 1,40 | 1,21 | 1,54 | 1,54 | 1,92 | 1,89 | 1,77 | 1,70 | 1,32 | 1,48 |
| p821.596@10.3 |            | 2,12 | 2,26 | 1,89 | 1,75 | 1,76 | 1,88 | 1,85 | 1,78 | 1,80 | 0,00 | 1,77 | 1,83 |
| p823.543@12.1 |            | 1,61 | 1,58 | 1,71 | 1,69 | 1,62 | 1,74 | 1,71 | 1,68 | 1,75 | 1,79 | 1,68 | 1,62 |
| p824.486@6.8  |            | 2,75 | 2,74 | 2,93 | 2,81 | 2,84 | 2,72 | 2,88 | 2,84 | 2,93 | 2,86 | 2,85 | 2,79 |
| p825.486@6.8  |            | 2,38 | 2,41 | 2,56 | 2,49 | 2,48 | 2,36 | 2,54 | 2,48 | 2,56 | 2,51 | 2,54 | 2,43 |
| p826.489@6.8  |            | 1,90 | 1,89 | 2,12 | 2,01 | 1,91 | 1,86 | 2,03 | 1,99 | 2,05 | 2,01 | 2,02 | 1,96 |
| p828.516@6.9  |            | 2,69 | 2,84 | 2,76 | 2,74 | 2,77 | 2,87 | 2,78 | 2,79 | 2,80 | 2,79 | 2,74 | 2,74 |
| p829.458@6.8  |            | 2,64 | 2,64 | 2,78 | 2,64 | 2,65 | 2,61 | 2,80 | 2,79 | 2,63 | 2,69 | 2,72 | 2,60 |
| p830.447@6.8  |            | 2,31 | 2,24 | 2,38 | 2,31 | 2,34 | 2,16 | 2,44 | 2,42 | 2,27 | 2,25 | 2,34 | 2,23 |
| p831.482@7.4  |            | 2,92 | 2,85 | 3,19 | 3,12 | 3,19 | 3,47 | 3,06 | 3,06 | 3,15 | 3,24 | 3,28 | 3,17 |
| p832.486@7.4  |            | 2,53 | 2,51 | 2,85 | 2,77 | 2,81 | 3,10 | 2,73 | 2,65 | 2,80 | 2,91 | 2,89 | 2,79 |
| p833.474@6.9  |            | 2,60 | 2,74 | 2,71 | 2,64 | 2,70 | 2,75 | 2,81 | 2,81 | 2,68 | 2,69 | 2,59 | 2,59 |
| p834.477@6.9  |            | 2,25 | 2,30 | 2,32 | 2,24 | 2,27 | 2,39 | 2,43 | 2,39 | 2,30 | 2,28 | 2,23 | 2,26 |
| p835.534@9.6  |            | 2,69 | 2,60 | 2,77 | 2,50 | 2,35 | 2,43 | 2,30 | 2,25 | 2,52 | 2,75 | 2,78 | 2,76 |
| p836.539@9.6  | C47H76O16  | 2,36 | 2,36 | 2,55 | 2,25 | 2,07 | 2,17 | 1,96 | 1,95 | 2,27 | 2,51 | 2,51 | 2,46 |
| p837.53@9.6   |            | 2,08 | 1,99 | 2,08 | 1,84 | 1,82 | 1,92 | 1,73 | 1,75 | 2,01 | 2,10 | 2,11 | 1,96 |
| p839.512@12.1 |            | 3,18 | 3,15 | 3,02 | 2,85 | 2,87 | 2,98 | 3,40 | 3,38 | 3,25 | 3,30 | 2,96 | 3,04 |

|               |            |      |      |      |      |      |      |      |      |      |      |      |      |
|---------------|------------|------|------|------|------|------|------|------|------|------|------|------|------|
| p839.564@10.3 |            | 2,03 | 2,02 | 2,14 | 2,15 | 2,12 | 2,20 | 2,10 | 2,17 | 2,10 | 2,19 | 2,08 | 2,10 |
| p840.57@10.3  |            | 2,90 | 2,87 | 2,75 | 2,53 | 2,63 | 2,73 | 3,12 | 3,13 | 2,94 | 3,01 | 2,70 | 2,74 |
| p841.568@10.3 |            | 2,42 | 2,40 | 2,31 | 2,16 | 2,18 | 2,31 | 2,66 | 2,66 | 2,57 | 2,58 | 2,31 | 2,31 |
| p842.568@10.3 |            | 1,85 | 1,78 | 1,77 | 1,57 | 1,51 | 1,80 | 2,10 | 2,02 | 1,94 | 1,94 | 1,68 | 1,75 |
| p845.417@6.8  |            | 2,34 | 2,26 | 2,43 | 2,31 | 2,26 | 2,11 | 2,46 | 2,47 | 2,34 | 2,29 | 2,27 | 2,25 |
| p846.421@6.8  |            | 1,93 | 1,99 | 2,05 | 1,89 | 1,90 | 1,80 | 2,21 | 2,11 | 1,85 | 1,93 | 1,93 | 1,78 |
| p849.448@6.9  | C21H28O8   | 2,41 | 2,54 | 2,42 | 2,43 | 2,36 | 2,48 | 2,57 | 2,54 | 2,40 | 2,36 | 2,26 | 2,37 |
| p850.455@6.9  |            | 1,92 | 2,21 | 2,08 | 2,00 | 1,95 | 2,07 | 2,11 | 2,21 | 1,85 | 2,02 | 1,97 | 1,94 |
| p851.485@6.9  |            | 3,10 | 3,28 | 3,23 | 3,18 | 3,18 | 3,19 | 3,24 | 3,22 | 3,15 | 3,21 | 3,21 | 3,08 |
| p852.489@6.9  | C30H52O7P2 | 2,70 | 2,92 | 2,90 | 2,81 | 2,85 | 2,83 | 2,90 | 2,87 | 2,76 | 2,83 | 2,86 | 2,72 |
| p853.496@7.4  |            | 2,92 | 2,86 | 3,20 | 3,16 | 3,19 | 3,35 | 3,13 | 3,02 | 3,19 | 3,21 | 3,25 | 3,20 |
| p854.5@7.4    |            | 2,57 | 2,56 | 2,86 | 2,83 | 2,84 | 2,99 | 2,74 | 2,76 | 2,84 | 2,86 | 2,88 | 2,83 |
| p855.517@7    |            | 2,60 | 2,75 | 2,72 | 2,56 | 2,66 | 2,60 | 2,69 | 2,66 | 2,62 | 2,72 | 2,73 | 2,62 |
| p856.524@7    | C35H44O9   | 2,21 | 2,47 | 2,34 | 2,28 | 2,32 | 2,22 | 2,34 | 2,29 | 2,24 | 2,30 | 2,34 | 2,29 |
| p857.524@7    |            | 1,70 | 1,98 | 1,87 | 1,80 | 1,79 | 1,68 | 1,87 | 1,78 | 1,68 | 1,84 | 1,86 | 1,66 |
| p862.513@7.4  |            | 2,05 | 1,99 | 2,30 | 2,26 | 2,24 | 2,41 | 2,13 | 2,15 | 2,30 | 2,28 | 2,36 | 2,31 |
| p864.487@7.4  |            | 1,77 | 1,61 | 1,93 | 1,94 | 1,92 | 2,02 | 1,89 | 1,86 | 1,92 | 1,95 | 1,94 | 1,85 |
| p867.471@9.6  | C41H56N8O9 | 2,24 | 2,14 | 2,32 | 2,16 | 2,07 | 2,22 | 2,16 | 2,11 | 2,21 | 2,33 | 2,33 | 2,26 |
| p868.511@6.9  |            | 2,60 | 2,84 | 2,76 | 2,72 | 2,70 | 2,82 | 2,80 | 2,78 | 2,84 | 2,78 | 2,75 | 2,71 |
| p869.509@6.9  |            | 2,38 | 2,57 | 2,55 | 2,40 | 2,38 | 2,53 | 2,53 | 2,48 | 2,57 | 2,50 | 2,50 | 2,45 |
| p871.503@10.3 | C32H47N5O6 | 2,17 | 2,14 | 2,27 | 2,19 | 2,33 | 2,36 | 2,38 | 2,33 | 2,24 | 2,35 | 2,27 | 2,24 |
| p872.542@7    |            | 2,50 | 2,77 | 2,68 | 2,61 | 2,58 | 2,55 | 2,58 | 2,56 | 2,69 | 2,66 | 2,64 | 2,61 |
| p873.485@6.9  |            | 2,59 | 2,71 | 2,71 | 2,63 | 2,61 | 2,66 | 2,75 | 2,74 | 2,59 | 2,65 | 2,62 | 2,61 |
| p874.481@6.9  |            | 2,25 | 2,35 | 2,29 | 2,15 | 2,30 | 2,29 | 2,36 | 2,41 | 2,19 | 2,26 | 2,18 | 2,26 |
| p875.509@7.4  | C24H36O3   | 2,75 | 2,73 | 3,04 | 3,01 | 3,07 | 3,20 | 2,90 | 2,93 | 3,06 | 3,08 | 3,12 | 3,07 |
| p876.513@7.4  |            | 2,45 | 2,44 | 2,76 | 2,64 | 2,81 | 2,89 | 2,65 | 2,60 | 2,72 | 2,77 | 2,81 | 2,73 |
| p877.5@7      |            | 2,53 | 2,70 | 2,65 | 2,52 | 2,57 | 2,56 | 2,68 | 2,61 | 2,50 | 2,59 | 2,60 | 2,53 |
| p878.502@7    |            | 2,15 | 2,34 | 2,26 | 2,19 | 2,21 | 2,23 | 2,24 | 2,19 | 2,17 | 2,18 | 2,20 | 2,16 |
| p889.44@6.9   |            | 2,33 | 2,32 | 2,32 | 2,23 | 2,15 | 2,29 | 2,34 | 2,47 | 2,21 | 2,24 | 2,26 | 2,46 |
| p890.584@9    | C18H37NO   | 2,05 | 2,01 | 2,39 | 2,46 | 2,55 | 2,59 | 2,02 | 2,02 | 2,22 | 2,28 | 2,12 | 2,07 |
| p891.586@9    |            | 1,73 | 1,64 | 2,14 | 2,19 | 2,27 | 2,34 | 1,62 | 1,74 | 1,86 | 1,95 | 1,86 | 1,83 |
| p893.472@7    |            | 2,30 | 2,45 | 2,34 | 2,25 | 2,21 | 2,28 | 2,41 | 2,38 | 2,22 | 2,23 | 2,26 | 2,18 |
| p894.475@7    | C22H29FO5  | 1,96 | 2,20 | 1,99 | 1,88 | 1,67 | 1,96 | 2,07 | 2,04 | 1,83 | 1,76 | 1,84 | 1,84 |
| p895.51@7     |            | 2,81 | 2,92 | 2,96 | 2,86 | 2,89 | 2,98 | 2,88 | 2,81 | 2,83 | 2,90 | 2,94 | 2,78 |
| p896.517@7    |            | 2,54 | 2,64 | 2,61 | 2,51 | 2,50 | 2,48 | 2,56 | 2,50 | 2,49 | 2,55 | 2,44 | 2,24 |
| p897.521@7.5  |            | 2,41 | 2,34 | 2,79 | 2,67 | 2,72 | 3,03 | 2,60 | 2,60 | 2,72 | 2,78 | 2,75 | 2,74 |
| p898.526@7.5  | C43H48N4O6 | 2,12 | 2,06 | 2,44 | 2,38 | 2,48 | 2,71 | 2,30 | 2,30 | 2,24 | 2,45 | 2,49 | 2,38 |
| p899.544@7.1  |            | 2,29 | 2,44 | 2,46 | 2,33 | 2,37 | 2,56 | 2,27 | 2,32 | 2,35 | 2,44 | 2,46 | 2,18 |
| p900.55@7     |            | 1,94 | 2,11 | 2,13 | 2,02 | 2,02 | 2,22 | 2,03 | 1,88 | 1,96 | 2,09 | 2,11 | 1,96 |
| p912.538@7    |            | 2,35 | 2,54 | 2,57 | 2,45 | 2,46 | 2,64 | 2,52 | 2,45 | 2,58 | 2,44 | 2,55 | 2,39 |
| p913.531@7    |            | 2,28 | 2,40 | 2,44 | 2,31 | 2,31 | 2,50 | 2,32 | 2,21 | 2,44 | 2,38 | 2,31 | 2,30 |
| p916.57@7.1   |            | 2,28 | 2,48 | 2,46 | 2,37 | 2,26 | 2,61 | 2,27 | 2,12 | 2,47 | 2,47 | 2,39 | 2,37 |

|              |            |      |      |      |      |      |      |      |      |      |      |      |      |
|--------------|------------|------|------|------|------|------|------|------|------|------|------|------|------|
| p917.512@7   |            | 2,37 | 2,47 | 2,46 | 2,33 | 2,39 | 2,49 | 2,37 | 2,36 | 2,31 | 2,39 | 2,43 | 2,30 |
| p918.506@7   |            | 2,05 | 2,19 | 2,15 | 1,97 | 2,03 | 2,11 | 2,11 | 2,05 | 1,99 | 2,03 | 1,97 | 1,95 |
| p919.534@7.5 |            | 2,32 | 2,32 | 2,73 | 2,60 | 2,71 | 2,81 | 2,48 | 2,47 | 2,66 | 2,69 | 2,73 | 2,68 |
| p920.538@7.5 |            | 2,11 | 1,97 | 2,48 | 2,34 | 2,40 | 2,58 | 2,23 | 2,20 | 2,41 | 2,45 | 2,47 | 2,43 |
| p921.528@7.1 |            | 2,36 | 2,51 | 2,47 | 2,45 | 2,40 | 2,61 | 2,42 | 2,39 | 2,41 | 2,46 | 2,44 | 2,32 |
| p922.531@7.1 |            | 2,01 | 2,23 | 2,15 | 2,01 | 2,07 | 2,18 | 2,11 | 2,02 | 1,96 | 2,10 | 2,05 | 1,93 |
| p933.468@7   |            | 2,02 | 2,18 | 2,05 | 1,96 | 2,00 | 2,05 | 2,08 | 2,07 | 1,86 | 1,86 | 2,10 | 1,83 |
| p937.5@7.1   |            | 2,15 | 2,26 | 2,18 | 2,10 | 2,05 | 2,28 | 2,19 | 2,17 | 2,08 | 2,12 | 2,15 | 2,08 |
| p939.535@7   |            | 2,41 | 2,79 | 2,68 | 2,65 | 2,64 | 2,84 | 2,77 | 2,74 | 2,65 | 2,56 | 2,60 | 2,59 |
| p941.545@7.5 |            | 2,16 | 2,13 | 2,49 | 2,39 | 2,47 | 2,58 | 2,34 | 2,26 | 2,45 | 2,55 | 2,56 | 2,48 |
| p961.528@7   | C21H41N5O7 | 2,16 | 2,39 | 2,29 | 2,25 | 2,21 | 2,41 | 2,43 | 2,37 | 2,24 | 2,16 | 2,04 | 2,17 |
| p965.555@7.1 |            | 1,88 | 2,12 | 2,15 | 2,03 | 1,89 | 2,33 | 2,25 | 2,10 | 1,94 | 1,91 | 1,96 | 1,96 |
| p983.566@7.1 | C6H13NO2   | 2,44 | 2,63 | 2,58 | 2,51 | 2,52 | 2,68 | 2,57 | 2,55 | 0,00 | 0,00 | 0,00 | 0,00 |
